# Supplementary material for: Synthesis of meso-(4′-cyanophenyl) porphyrins: efficient photocytotoxicity against A549 cancer cells and their DNA interactions
Source: Royal Society of Chemistry journal article supplement (doi:10.1039/c5ra03075g), 2015-01-01
Supplement: c5ra03075g1.pdf [file c5ra03075g1.pdf]

# Supporting Information

## Synthesis of meso-(4'-cyanophenyl)porphyrins: efficient photocytotoxicity against A549 cancer cells and their DNA interactions

Dalip Kumar,<sup>a\*</sup> Bhupendra Mishra,<sup>a</sup> K. P. Chandrashekar,<sup>a</sup> Santosh B. Khandagale,<sup>a</sup> Mukund P. Tantak,<sup>a</sup> Anil Kumar,<sup>a</sup> Kanako Akamatsu,<sup>b</sup> Eriko Kusaka,<sup>b</sup> and Takeo Ito<sup>b\*</sup>

<sup>a</sup>Department of Chemistry, Birla Institute of Technology and Science, Pilani- 333 031, India, Tel.: +91-1596-245073-5238; fax: +91-1596-244183; e-mail: [dalipk@pilani.bits-pilani.ac.in](mailto:dalipk@pilani.bits-pilani.ac.in)

<sup>b</sup>Department of Energy and Hydrocarbon Chemistry, Graduate School of Engineering, Kyoto University, Kyoto 615-8510, Japan; e-mail: [takeoito.kyoto@gmail.com](mailto:takeoito.kyoto@gmail.com)

## Contents

|    |                                                  |     |
|----|--------------------------------------------------|-----|
| 1. | General methods                                  | S2  |
| 2. | Experimental                                     | S3  |
| 3. | Absorption Spectra for porphyrins <b>7b-c</b>    | S9  |
| 4. | DNA photocleavage assay and cell viability plots | S10 |
| 5. | Mass and NMR Spectra of porphyrins <b>7-9</b>    | S15 |
| 6. | References:                                      | S33 |

## General Methods

The reagents and solvents were procured from commercial sources and used as such unless otherwise mentioned. Tetrahydrofuran (THF) was freshly distilled over sodium wire in presence of benzophenone, dichloromethane (DCM) was kept over anhydrous calcium chloride overnight and distilled over calcium hydride prior to use, diethyl ether was stored over anhydrous calcium chloride overnight and passed over activated basic alumina prior to use. Hexane was distilled prior to use to remove any higher boiling fractions. Silica gel for chromatography and TLC plates (60 F254) was procured from Merck. Fourier transform–infrared (FTIR) spectra were performed on Shimadzu IRPrestige–21 spectrometer. <sup>1</sup>H NMR spectra were recorded on Bruker Advance II 400 MHz spectrometer in CDCl<sub>3</sub> using tetramethylsilane (TMS) as internal standard. Spectral data are presented as follows: chemical shift, multiplicity (br = broad, s = singlet, d = doublet, t = triplet, q = quartet, m = multiplet), coupling constant (*J*) in Hertz (Hz). Electron Spray Ionization–time of flight MS (MALDI–TOF MS) spectrometry was performed using 2,5-dihydroxybenzoic acid (DHB) as the matrix. Steady-state absorption spectra were recorded on a Perkin-Elmer model Lambda25 absorption spectrophotometer. Fluorescence spectra were taken in a Hitachi model FL4500 spectrofluorimeter and all the spectra were corrected for the instrument response function. Quartz cuvettes of 10 mm optical path length received from PerkinElmer, USA (part no. B0831009) and Hellma, Germany (type 111-QS) were used for measuring absorption and fluorescence spectra, respectively. For fluorescence emission, the sample was excited at 450 nm. In both the cases, 5 nm bandpass was used in the excitation and emission side. The relative experimental error in the measured photophysical parameters was estimated within ±5%.

### Synthesis of 5-(4'-methylcarbonylphenyl)-10,15,20-triphenylporphyrin (1).<sup>1</sup>

To a refluxing solution of methyl 4-formylbenzoate (10 g, 60.97 mmol) in propionic acid (1200 mL), was added freshly distilled benzaldehyde (17.8 g, 167.9 mmol) and pyrrole (17.2 mL, 244 mmol) simultaneously at the same rates. The reaction mixture was heated under reflux for 1 h. After completion of the reaction, propionic acid was distilled off, cooled the residue and added water (500 mL). It was then basified to pH 8 with sodium carbonate and extracted with chloroform (3 × 500 mL). The organic layers were collected, dried over anhydrous sodium sulphate and then evaporated. The residue was purified by column chromatography on silica gel using chloroform/hexane (70:30 v/v) as eluent to afford **1**.

Purple colour solid, 9 % yield; IR (KBr): 3350, 3210, 2922, 1716 (C=O), 1600 (Ar-C=C), 1338, 1280 cm<sup>-1</sup>. <sup>1</sup>H NMR (400 MHz, CDCl<sub>3</sub>) δ 8.95 – 8.80 (m, 6H), 8.73 (d, *J* = 4.8 Hz, 2H), 8.34 (d, *J* = 8.3 Hz, 2H), 8.21 (d, *J* = 7.4 Hz, 6H), 8.06 (d, *J* = 8.3 Hz, 2H), 7.83 – 7.68 (m, 8H), -2.80 (s, 2H); <sup>13</sup>C NMR (100.5 MHz, DMSO-*d*<sub>6</sub>) δ 168.3, 150.7, 149.3, 148.8, 144.1, 134.6, 134.5, 132.4, 129.6, 127.1, 126.7, 125.9, 120.6, 118.1, 117.9; MALDI-TOF: *m/z* for C<sub>42</sub>H<sub>29</sub>N<sub>5</sub> (M + H)<sup>+</sup>: Calcd:639.743; found: 643.2914.

### 5-(4'-methylcarbonylphenyl)-10,15,20-tri(4-pyridyl)porphyrin (2).<sup>2</sup>

Methyl-4-formylbenzoate (10 g, 66.6 mmol) was stirred in propionic acid (1200 mL) and heated at 110 °C, then pyridine-4-carbaldehyde (19.2 mL, 200 mmol) and pyrrole (18.7 mL, 266.4 mmol) were added dropwise at the same rates over a period of 15 min at 110 °C. The reaction mixture was then refluxed for 1 h and then the solvent was distilled under reduced pressure. The crude residue was taken into chloroform (300 mL), washed with saturated sodium carbonate solution (3 × 100 mL) and dried over anhydrous sodium sulphate. After removal of solvent *in vacuo*, the crude product so obtained was adsorbed over silica-gel and chromatographed on a silica column using a mixture of chloroform/ methanol (85:15) as eluent. The fifth fraction gave porphyrin **2**.

Purple colour solid, 7% yield; IR (KBr): 3350, 3210, 2922, 1716 (C=O), 1600 (Ar-C=C), 1338, 1280 cm<sup>-1</sup>. <sup>1</sup>H NMR (400 MHz, CDCl<sub>3</sub>) δ 8.95 – 8.80 (m, 3H), 8.73 (d, *J* = 4.8 Hz, 1H), 8.34 (d, *J* = 8.3 Hz, 1H), 8.21 (d, *J* = 7.4 Hz, 3H), 8.06 (d, *J* = 8.3 Hz, 1H), 7.83 – 7.68 (m, 4H), -2.80 (s, 1H); <sup>13</sup>C NMR (100.5 MHz, DMSO-*d*<sub>6</sub>) δ 168.3, 150.7, 149.3, 148.8, 144.1, 134.6, 134.5, 132.4, 129.6, 127.1, 126.7, 125.9, 120.6, 118.1, 117.9.

**5-(4'-carboxamidophenyl)-10,15,20-triphenyl-porphyrin (3)**

Purple colour solid, 85 % yield; Mp. > 300 °C; IR (KBr): 3466, 3317, 2922, 1666, 1220, 1072 cm<sup>-1</sup>. <sup>1</sup>H NMR (500 MHz, CDCl<sub>3</sub>) δ 8.44-8.40 (m, 8H), 8.13 (d, *J* = 7.5 Hz, 2H), 7.52 (d, *J* = 7.2 Hz, 2H), 7.32-7.28 (m, 6H), 7.21 – 7.17 (m, 9H), -2.66 (s, 2H); <sup>13</sup>C NMR (100.5 MHz, DMSO-*d*<sub>6</sub>) δ 169.3, 150.7, 149.3, 148.8, 144.1, 134.6, 134.5, 132.4, 129.6, 127.1, 126.7, 125.9, 120.6, 118.1, 117.9; FAB-MS: *m/z* for C<sub>45</sub>H<sub>32</sub>N<sub>5</sub>O (M + H)<sup>+</sup>: Calcd:658.2607; found: 658.2672.

**5-(4'-carboxamidophenyl)-10,15,20-tripyridyl-porphyrin (4)**

Purple colour solid, 78% yield; IR (KBr): 3470, 3058, 2929, 1669, 1596, 1222 cm<sup>-1</sup>; <sup>1</sup>H NMR (400 MHz, CDCl<sub>3</sub>) δ 8.44-8.40 (m, 6H), 8.17 (d, *J* = 8.6 Hz, 2H), 7.78-7.75 (m, 8H), 7.35 (d, *J* = 8.7 Hz, 2H), -2.76 (s, 2H); ESI-MS: *m/z* for C<sub>42</sub>H<sub>29</sub>N<sub>8</sub>O (M + H)<sup>+</sup>: Calcd:661.2664; found: 661.2941.

**5-(4'-thiocarboxamidophenyl)-10,15,20-triphenylporphyrin (5).<sup>3</sup>**

Lawesson's reagent (0.52 g, 1.29 mmol) was added to stirred suspension of **3** (0.5 g, 0.761 mmol) in dry toluene (25 mL) and heated the reaction mixture at 90 °C for 1 h. After completion of the reaction, the solvent was evaporated and the crude product was purified by a silica gel column chromatography using a mixture of chloroform:methanol (99:1 v/v) as eluent to give porphyrin **5**.

Purple colour solid, 78% yield; Mp. > 300 °C; IR (KBr): 3425, 3317, 2922, 1618, 1597, 1350 cm<sup>-1</sup>; <sup>1</sup>H NMR (400 MHz, CDCl<sub>3</sub>) δ 8.46 – 8.44 (m, 8H), 8.14 (d, *J* = 7.7 Hz, 2H), 7.68 (d, *J* = 7.6 Hz, 2H), 7.36-7.33 (m, 6H), 7.32–7.29 (m, 9H), -2.69 (s, 2H); FAB-MS: *m/z* for C<sub>42</sub>H<sub>32</sub>N<sub>5</sub>S (M + H)<sup>+</sup>: Calcd:674.2378; found: 674.2394.

**5-(4'-thiocarboxamidophenyl)-10,15,20-tripyridylporphyrin (6)**

Brown solid, 45% yield; Mp. > 300 °C; IR (KBr): 3427, 3320, 3048, 1616, 1598, 1474, 1355, 1187 cm<sup>-1</sup>; <sup>1</sup>H NMR (400 MHz, CDCl<sub>3</sub>) δ 8.88-8.84 (m, 6H), 8.22–8.20 (m, 6H), 8.15 (d, *J* = 8.9 Hz, 2H), 7.76–7.74 (m, 8H), 7.36 (d, *J* = 8.6 Hz, 2H, meso), -2.78 (s, 2H); <sup>13</sup>C NMR (100.5 MHz, DMSO-*d*<sub>6</sub>) δ 168.3, 150.7, 149.3, 148.8, 144.1, 134.6, 134.5, 132.4, 129.6, 127.1, 126.7, 125.9, 120.6, 118.1, 117.9; MALDI-TOF: *m/z* for C<sub>42</sub>H<sub>28</sub>N<sub>8</sub>S (M + H)<sup>+</sup>: Calcd:667.2236; found: 661.2247.

**5-(4'-cyanophenyl)-10,15,20-triphenyl-porphyrin (7a)**

To solution of porphyrin thioamide **5** (0.350 g, 0.52 mmol) in dry dichloromethane (30 mL) was added iodobenzene diacetate (0.176 g, 0.546 mmol) in one portion while maintaining the

temperature 27 °C. The reaction mixture was stirred at same temperature for 1h. The reaction contents were diluted with 10% sodium bicarbonate solution (15 mL) and extracted with dichloromethane (2 × 10 mL). The combined organic layers were washed with water (2 × 20 mL), dried over anhydrous sodium sulphate and the solvent was removed *in vacuo*. The solid so obtained was washed with methanol and dried under reduced pressure to afford analytical pure cyanoporphyrin **7a**

Dark brown solid, 66% yield; Mp. > 300 °C; IR (KBr): 3310, 3053, 3026, 2227, 1595, 1002 cm<sup>-1</sup>; <sup>1</sup>H NMR (400 MHz, CDCl<sub>3</sub>) δ 8.8–8.86 (m, 6H), 8.73 (d, *J* = 4.8 Hz, 2H), 8.35 (d, *J* = 9.2 Hz, 2H), 8.22–8.20 (m, 6H), 8.07 (d, *J* = 9.2, 2H), 7.79–7.74 (m, 9H), –2.80 (s, 2H); <sup>13</sup>C NMR (100.5 MHz, DMSO-*d*<sub>6</sub>) δ 155.9, 144.8, 143.8, 134.4, 131.7, 130.9, 120.2, 118.1, 115.2, 114.5, 111.2; ESI-MS: *m/z* for C<sub>45</sub>H<sub>30</sub>N<sub>5</sub> (M+H) Calcd:640.2993; found: 640.3026; UV–vis λ<sub>max</sub> (nm): 409 (log ε = 5.4), 518 (log ε = 4.4), 553 (log ε = 4.0), 592 (log ε = 3.9), 647 (log ε = 3.7).

**[5-(4'-cyanophenyl)-10,15,20-triphenylporphyrinato]Zn(II) (7b).**

To a stirred solution of cyanoporphyrin **7** (0.050 g, 0.078 mmol) in chloroform:methanol (3:1, 10 mL) was added zinc acetate (0.019 g, 0.0858 mmol) and refluxed the mixture for 1h. After the reaction was complete, the contents were diluted with water (50 mL). The organic layers were separated, dried over anhydrous sodium sulphate and the solvent was evaporated *in vacuo*. The crude solid product was stirred in methanol, filtered and dried under reduced pressure to afford analytically pure cyanoporphyrinate **7b**.

Dark brown solid, 94% yield; Mp. > 300 °C; IR (KBr): 3010, 2922, 2227,1600, 1335, 1101 cm<sup>-1</sup>; <sup>1</sup>H NMR (400 MHz, CDCl<sub>3</sub>) δ 8.81–8.72 (m, 8H), 8.38 (d, *J* = 7.8 Hz, 2H), 8.26 (d, *J* = 8.3 Hz, 2H), 8.17–8.16 (m, 6H), 7.79–7.78 (m, 9H); ESI-MS: *m/z* for C<sub>45</sub>H<sub>28</sub>N<sub>5</sub>Zn (M + H)<sup>+</sup> Calcd:702.2036; found: 702.2071; UV–vis λ<sub>max</sub> (nm): 425 (log ε = 5.5), 560 (log ε = 4.6), 601 (log ε = 4.2).

**[5-(4'-cyanophenyl)-10,15,20-triphenyl-porphyrinato]Cu(II) (7c).**

Dark brown solid, 96% yield; Mp. > 300 °C; IR (KBr): 3012, 2922, 2227,1601,1335, 1101 cm<sup>-1</sup>; ESI-MS: *m/z* for C<sub>45</sub>H<sub>29</sub>CuN<sub>5</sub> (M+H)<sup>+</sup> Calcd: 701.1641; found: 701.2040.

**5-(4'-cyanophenyl)-10,15,20-tripyridyl-porphyrin (8a).**

To a solution of (thiocarboxamidophenyl)porphyrin **6** (0.2 g, 0.29 mmol) in dry dichloromethane (20 mL) was added iodobenzene diacetate (0.098 g, 0.304 mmol) in one portion while maintaining the temperature 27 °C. The reaction mixture was stirred at same temperature for 1h.

The reaction contents were diluted with 10% sodium bicarbonate solution (15 mL) and extracted with dichloromethane (2 × 10 mL). The combined organic layers were washed with water (2 × 20 mL), dried over anhydrous sodium sulphate and concentrated in vacuo. The solid obtained was washed with a mixture of dichloromethane/hexane and dried under reduced pressure to afford analytical pure cyanoporphyrin **8a**.

Brown solid, 58% yield; Mp. > 300 °C; IR (KBr): 3437, 3255, 3027, 2925, 2228, 1598, 1345 cm<sup>-1</sup>; <sup>1</sup>H NMR (400 MHz, CDCl<sub>3</sub>) δ 8.98–8.97 (m, 6H), 8.57–8.56 (m, 2H), 8.46–8.44 (m, 2H), 8.25–8.24 (m, 6H), 7.79–7.75 (m, 8H), –2.74 (s, 2H); <sup>13</sup>C NMR (100.5 MHz, DMSO-*d*<sub>6</sub>) δ 150.8, 148.7, 145.6, 144.4, 139.2, 135.0, 129.6, 127.6, 123.2, 122.7, 119.8, 114.9.

**[5-(4'-cyanophenyl)-10,15,20-tripyridylporphyrinato]Zn(II) (8b)**. Dark brown solid, Mp. > 300 °C; IR (KBr): 3436, 3254, 3010, 2922, 2227, 1600, 1335, 1101 cm<sup>-1</sup>; <sup>1</sup>H NMR (400 MHz, CDCl<sub>3</sub>) δ 8.81–8.72 (m, 8H), 8.38 (d, *J* = 7.8 Hz, 2H), 8.26 (d, *J* = 8.3 Hz, 2H), 8.17–8.16 (m, 6H), 7.79–7.78 (m, 9H); ESI-MS: *m/z* for C<sub>45</sub>H<sub>28</sub>N<sub>5</sub>Zn (M + H)<sup>+</sup> Calcd: 702.2036; found: 702.2071; UV-vis λ<sub>max</sub> (nm): 427 (log ε = 5.5), 560 (log ε = 4.6), 601 (log ε = 4.2).

**5-(4'-cyanophenyl)-10,15,20-tri-(4-*N* methylpyridiniumyl) porphyrin (9a)**.

To a stirred solution of 5-(4'-cyanophenyl)-10,15,20-tripyridylporphyrin **8a** (50 mg, 0.078 mmol) in dry chloroform (10 mL) and DMF (1.0 mL) in a two-necked flask equipped with a condenser and a rubber septum was added a large excess of iodomethane (0.50 mL, 7.78 mmol) via syringe. The reaction mixture was stirred at 65 °C for 72 h. After cooling to room temperature, the solvents were evaporated in vacuo. The residue was precipitated with dry diethyl ether and methanol (1:1) and then thoroughly washed with the same mixture of solvents to obtain porphyrin **9a**.

Brown solid, 95% yield; Mp. > 300 °C; IR (KBr): 3417, 3085, 2925, 2229, 1593, 1352 cm<sup>-1</sup>; <sup>1</sup>H NMR (500 MHz, DMSO-*d*<sub>6</sub>) δ 9.51–9.50 (m, 6H), 9.22–9.14 (m, 6H), 9.02 (s, 8H), 8.47–8.37 (m, 4H), 4.75 (s, 9H), –3.03 (s, 2H); <sup>13</sup>C NMR (100.5 MHz, DMSO-*d*<sub>6</sub>) δ 156.8, 145.7, 144.8, 135.4, 132.7, 131.7, 121.1, 119.4, 116.1, 115, 48.4; ESI-MS: *m/z* for C<sub>45</sub>H<sub>36</sub>N<sub>8</sub> (M<sup>+</sup>) Calcd: 687.2968; found: 687.3010; UV-vis λ<sub>max</sub> (nm): 420 (log ε = 5.3), 518 (log ε = 4.1), 583 (log ε = 3.7), 599 (log ε = 3.5), 640 (log ε = 3.2).

**[5-(4'-cyanophenyl)-10,15,20-tri-(4-*N*-methylpyridiniumyl) porphyrinato]Zn(II) (9b)**.

Dark brown solid, 94% yield; Mp. > 300 °C; IR (KBr): 3126, 3024, 2976, 2229, 1591, 1276, 1066 cm<sup>-1</sup>; <sup>1</sup>H NMR (400 MHz, DMSO-*d*<sub>6</sub>) δ 9.41–9.39 (m, 6H), 9.05–8.89 (m, 10H), 8.38–7.93

(m, 8H), 4.69 (s, 9H);  $^{13}\text{C}$  NMR (100.5 MHz, DMSO- $d_6$ )  $\delta$  158.5, 150.1, 148.9, 144.1, 135.5, 133.6, 133.2, 133.1, 131.4, 116.4, 48.4); ESI-MS: m/z for  $\text{C}_{45}\text{H}_{33}\text{N}_8\text{Zn}$  ( $\text{M}^+$ ) Calcd: 749.2362; found: 749.2377; UV-vis  $\lambda_{\text{max}}$  (nm): 434 (log  $\epsilon$  = 4.8), 562 (log  $\epsilon$  = 3.7), 604 (log  $\epsilon$  = 3.3).

### **DNA Cleavage Assay**

Photoirradiation was carried out using a high pressure Xe-arc through a band-path filter (UTVAF-36U, Sigma-Koki, Tokyo, Japan) ( $\lambda$  = 300-390 nm, 4 mWcm $^{-2}$ , UV-A) or a white LED light source (ISL-150 $\times$ 150-WW, CCS, Kyoto, Japan) ( $\lambda$  = 400-800 nm, 2 mWcm $^{-2}$ , visible). Because excitation with the Xe-arc at around 400 nm resulted in too efficient DNA fragmentation, a band-path filter (UTVAF-36U, Sigma-Koki, Tokyo, Japan) ( $\lambda$  = 300-390 nm, 4 mWcm $^{-2}$ , UV-A) was used for the UV irradiation. Irradiance from the light sources were measured at the positions of the samples (4 cm from the lamp house (UV-A); 2 cm from the surface of LED light source (vis)) with a UVX Radiometer (UVP). Photointensity from the light sources were measured with a gel electrophoresis apparatus (Mupid-exu, Advance, Tokyo, Japan) was used for agarose gel electrophoresis. DNA cleavage studies were performed by the use of supercoiled, covalently closed, circular  $\Phi\text{X174}$  RF I DNA (Form I) (New England Biolabs, USA). Typically, solution of  $\Phi\text{X174}$  RF I DNA (1-0.5  $\mu\text{g}$ ) and the drugs in 20 mM Tris-HCl buffer (pH 7.2) containing 20 mM NaCl and 2.5 vol% DMSO (total volume 20  $\mu\text{L}$ ) was exposed to UV-A or visible light at ambient temperature. The resultant mixtures were then analyzed by gel electrophoresis (1% agarose gel, ethidium bromide stain). DNA cleavage was determined by the formation of relaxed circular DNA (Form II) and linear DNA (Form III). The gels were visualized on a UV transilluminator ( $\lambda_{\text{ex}}$  = 312 nm, ETX-35.M, Vilber-Lourmat, France).

### **Assessment of cytotoxicity toward A549 cells**

A549 cells were cultured in Dulbecco's modified Eagle's medium (DMEM) containing 10% fetal bovine serum (FBS). The cells were seeded into 96-well plates (2000 cells/well) and cultured at 37  $^{\circ}\text{C}$  in a well-humidified incubator with 5%  $\text{CO}_2$  and 95% air for 24 h. The cells were then incubated with various concentrations of porphyrins for 24 h, and then washed with PBS. Cells were exposed to UV-A or visible light for 10 min, and then the medium was replaced to DMEM. After further incubation for 24 h, cell viability was determined using a Cell Counting kit-8 (WST-8, DOJINDO, Japan) and a microplate spectrophotometer (xMark, BIO-RAD). Cell viability after UV- or vis-light exposure in the absence of porphyrins are 76.5% and 97.5%, respectively.

### Preparation of porphyrin **8a** by an alternate method.<sup>4, 5</sup>

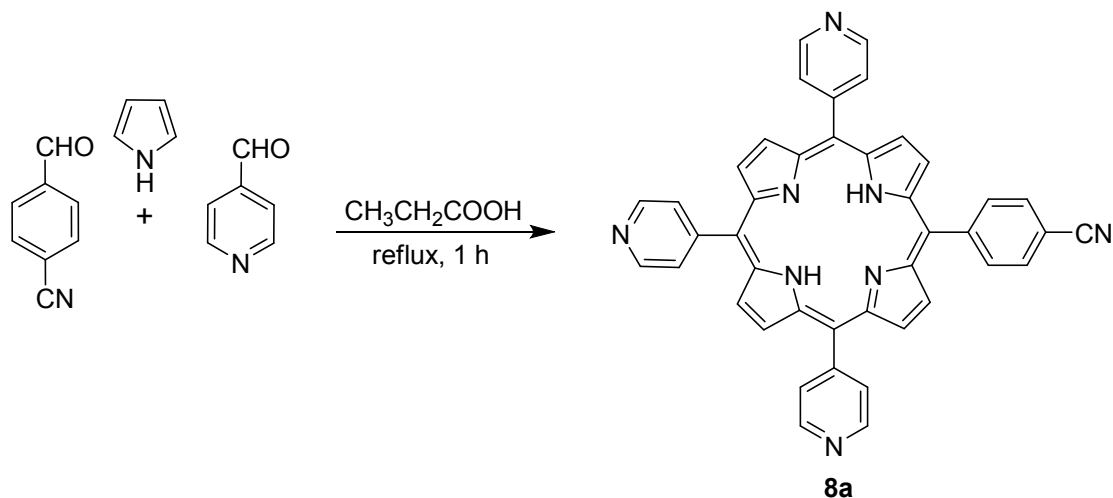

**Scheme S1** Synthesis of 5-(4-cyanophenyl)-10,15,20-tri(4-pyridyl)porphyrin **8a**.

To a refluxing solution of 4-cyanobenzaldehyde (1 g, 7.63 mmol) in propionic acid (120 mL), was added freshly distilled 4-pyridine carboxaldehyde (2.16 mL, 22.89 mmol) and pyrrole (2.15 mL, 30.52 mmol) simultaneously at the same rates. The reaction mixture was heated under reflux for 1 h. After completion of the reaction, propionic acid was distilled off, cooled the residue and added water (100 mL). It was then basified to pH 8 with sodium carbonate and extracted with chloroform ( $3 \times 150$  mL). The organic layers were collected, dried over anhydrous sodium sulphate and then evaporated. The residue was purified by column chromatography on silica gel using chloroform/methanol (99:1 v/v) as eluent to afford **8a** (0.37 g, Yield: 7.5 %), m.p.  $>300$  °C. IR (KBr): 3439, 3256, 3027, 2925, 2229, 1598, 1346  $\text{cm}^{-1}$ .



## Absorption Spectra for porphyrins 7b-c

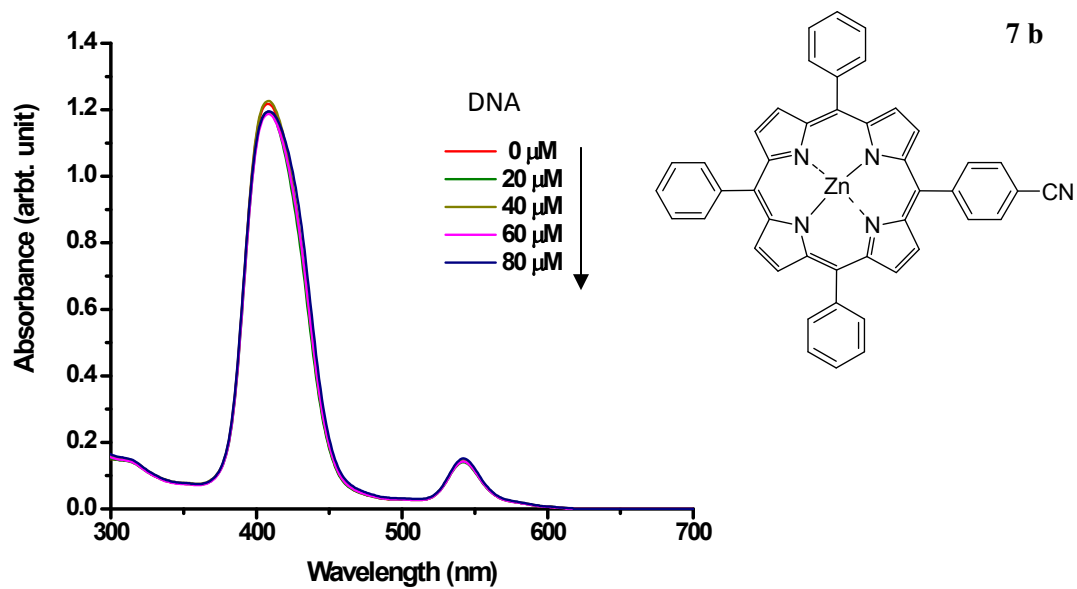

Fig. S1 Absorption spectra for 7b

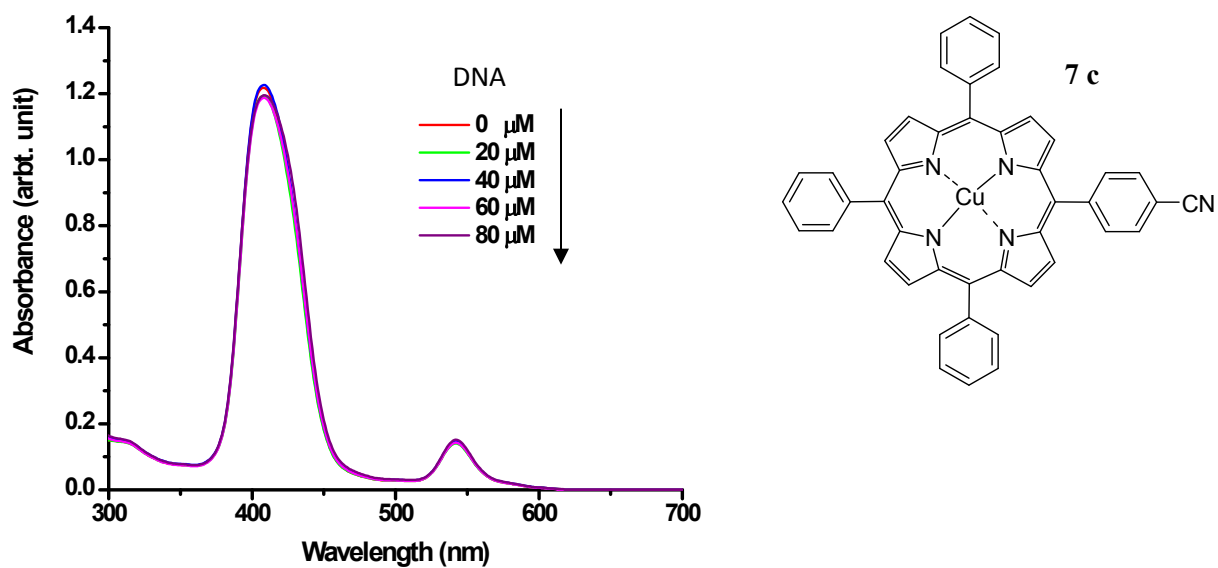

Fig. S2 Absorption spectra for 7c

## DNA photocleavage assay and cell viability plots

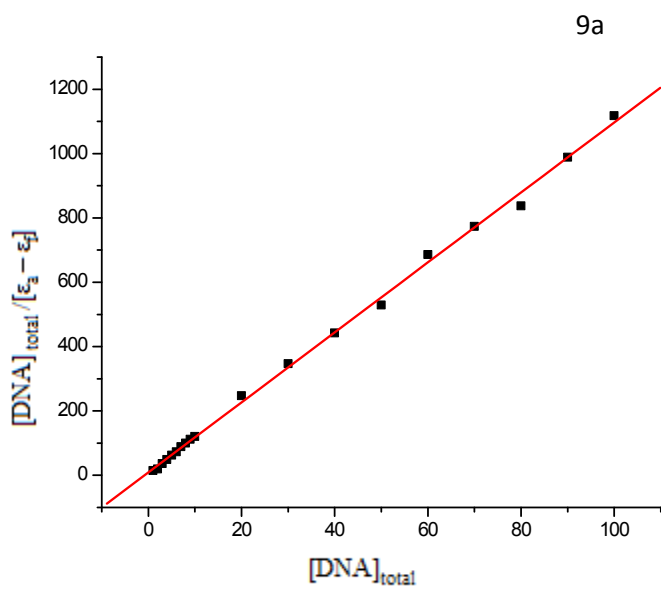

**Fig. S3** Plot of  $[DNA]_{total} / [\epsilon_a - \epsilon_f]$  versus  $[DNA]_{total}$  derived for calculating  $K_{app}$

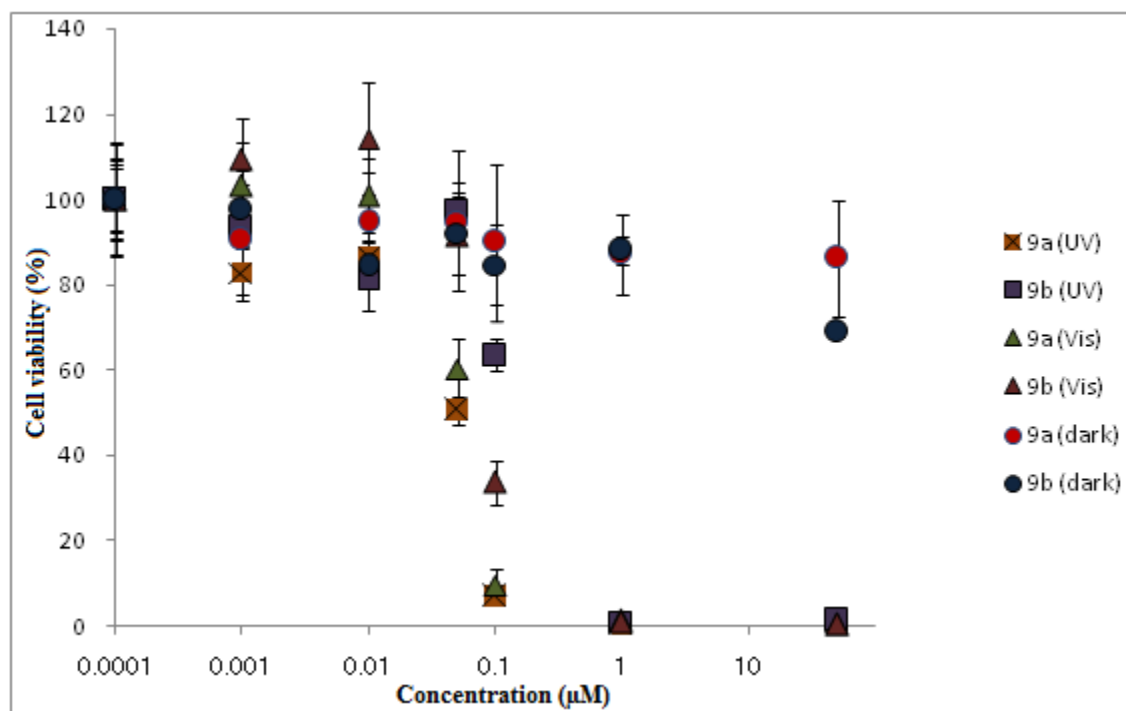

**Fig. S4** Cell viability plots for 5-(4'-cyanophenyl)porphyrins **9** in presence/absence of light

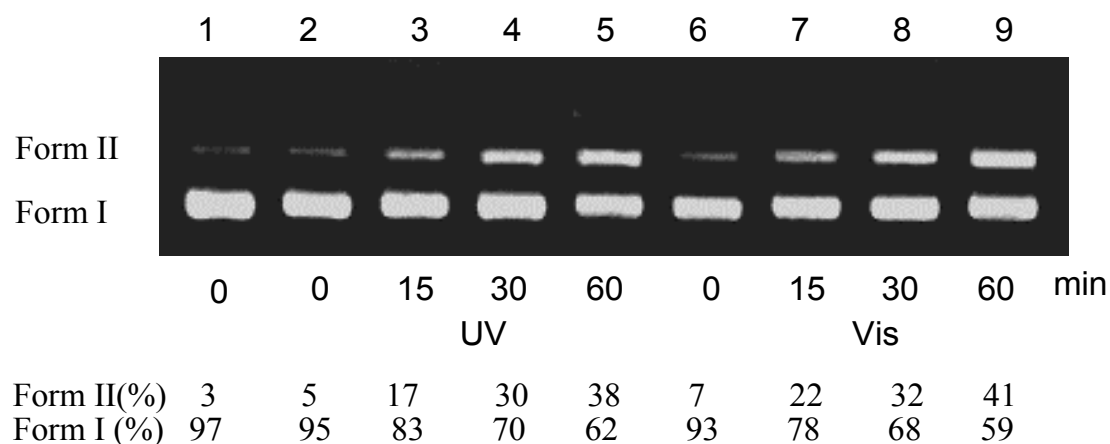

**Fig. S5** Photoinduced DNA cleavage by H<sub>2</sub>TMPyP. ΦX174 supercoiled DNA (1.0 μg) was incubated with H<sub>2</sub>TMPyP (1 μM) in 20 μl of Tris-HCl (20 mM, pH 7.2) containing NaCl (20 mM), DMSO (2.5 vol%) at ambient temperature in the dark for 30 min, and then exposed to UV-A light (lanes 2-5) or to visible light (>400 nm) (lanes 6-9) for the indicated periods. Lane 1: DNA alone.

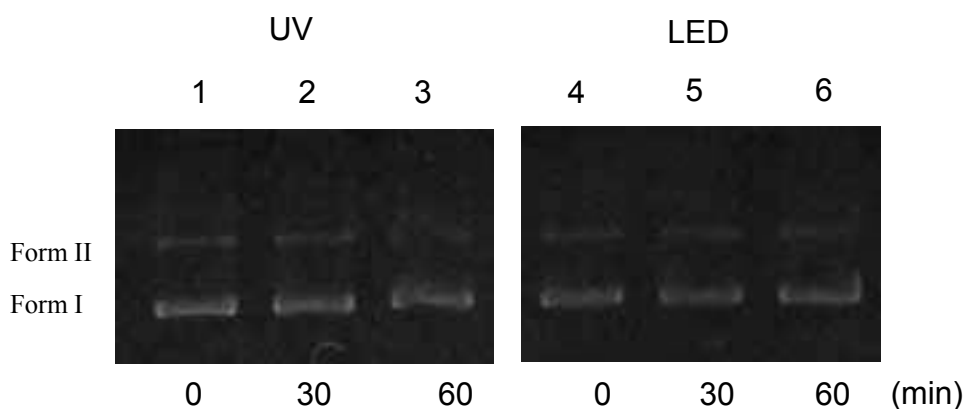

**Fig. S6** Control experiments (without Porphyrin) for the DNA cleavage assay. FX174 supercoiled DNA (1.0 mg) was incubated in 20 ml of Tris-HCl (20 mM, pH 7.2) containing NaCl (20 mM), DMSO (2.5 vol%) at ambient temperature in the dark for 30 min, and then exposed to (lanes 1-3) UV-light (310~390 nm) or (lanes 4-6) visible light (>400 nm) for the indicated periods.

## DNA photocleavage assay for compounds **7a** and **7b**

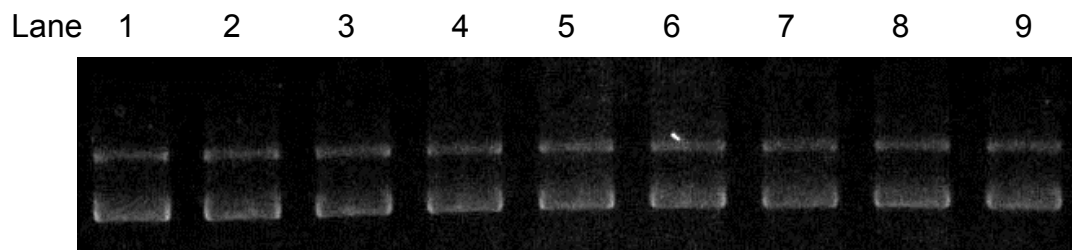

**Fig. S7** Photoinduced DNA cleavage by **7a**. FX174 supercoiled DNA (1 mg) was incubated with **7a** (1 mM) in 20 mL of Tris-HCl (20 mM, pH 7.2) containing NaCl (20 mM), DMSO (2.5 vol%) at ambient temperature in the dark for 30 min, and then exposed to (lanes 3-5) UV-A or (lanes 7-9) visible light. Lanes 2 and 6, DNA + **7a**; lanes 3 and 7, DNA + **7a** + hn 15 min; lanes 4 and 8, DNA + **7a** + hn 30 min; lanes 5 and 9, DNA + **7a** + hn 60 min; lane 1, DNA alone.

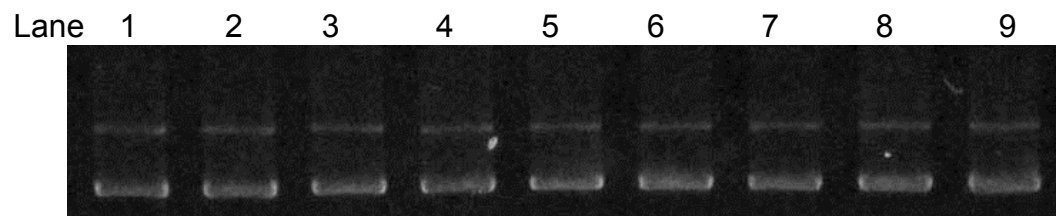

**Fig. S8** Photoinduced DNA cleavage by **7b**. FX174 supercoiled DNA (1 mg) was incubated with **7b** (1 mM) in 20 mL of Tris-HCl (20 mM, pH 7.2) containing NaCl (20 mM), DMSO (2.5 vol%) at ambient temperature in the dark for 30 min, and then exposed to (lanes 3-5) UV-A or (lanes 7-9) visible light. Lanes 2 and 6, DNA + **7b**; lanes 3 and 7, DNA + **7b** + hn 15 min; lanes 4 and 8, DNA + **7b** + hn 30 min; lanes 5 and 9, DNA + **7b** + hn 60 min; lane 1, DNA alone.

**Table S1** Cell viability data for cationic 5-(4'-cyanophenyl)porphyrins **9**

| <b>Dose</b><br>( $\mu$ M) | <b>9a</b><br>(UV) | <b>9a</b><br>(UV,S.D) | <b>9b</b><br>(UV) | <b>9b</b><br>(UV,S.D) | <b>9a</b><br>(Vis) | <b>9a</b><br>(Vis,<br>S.D.) | <b>9b</b><br>(Vis) | <b>9b</b><br>(S.D.) | <b>9a</b><br>Dark | <b>9a</b><br>(SD) | <b>9b</b><br>Dark | <b>9b</b><br>(SD) |
|---------------------------|-------------------|-----------------------|-------------------|-----------------------|--------------------|-----------------------------|--------------------|---------------------|-------------------|-------------------|-------------------|-------------------|
| 0                         | 100               | 13.21                 | 100               | 7.30                  | 100                | 9.78                        | 100                | 12.81               | 100               | 7.98              | 100               | 9.29              |
| 0.001                     | 83                | 6.30                  | 93                | 2.91                  | 103                | 10.15                       | 109                | 9.67                | 91                | 12.73             | 98                | 9.34              |
| 0.01                      | 86                | 4.09                  | 81                | 7.17                  | 101                | 8.64                        | 114                | 13.14               | 95                | 11.59             | 84                | 5.43              |
| 0.05                      | 51                | 3.32                  | 98                | 6.04                  | 60                 | 7.14                        | 91                 | 9.12                | 95                | 16.38             | 92                | 9.57              |
| 0.1                       | 7                 | 0.70                  | 63                | 3.78                  | 9                  | 3.90                        | 34                 | 5.30                | 90                | 18.31             | 85                | 9.42              |
| 1                         | 1                 | 0.15                  | 1                 | 0.18                  | 1                  | 0.55                        | 1                  | 0.30                | 87                | 9.38              | 88                | 3.25              |
| 50                        | 1                 | 0.31                  | 1                 | 0.18                  | 0                  | 0.71                        | 1                  | 0.15                | 86                | 13.60             | 69                | 0.87              |

\*SD = standard deviation

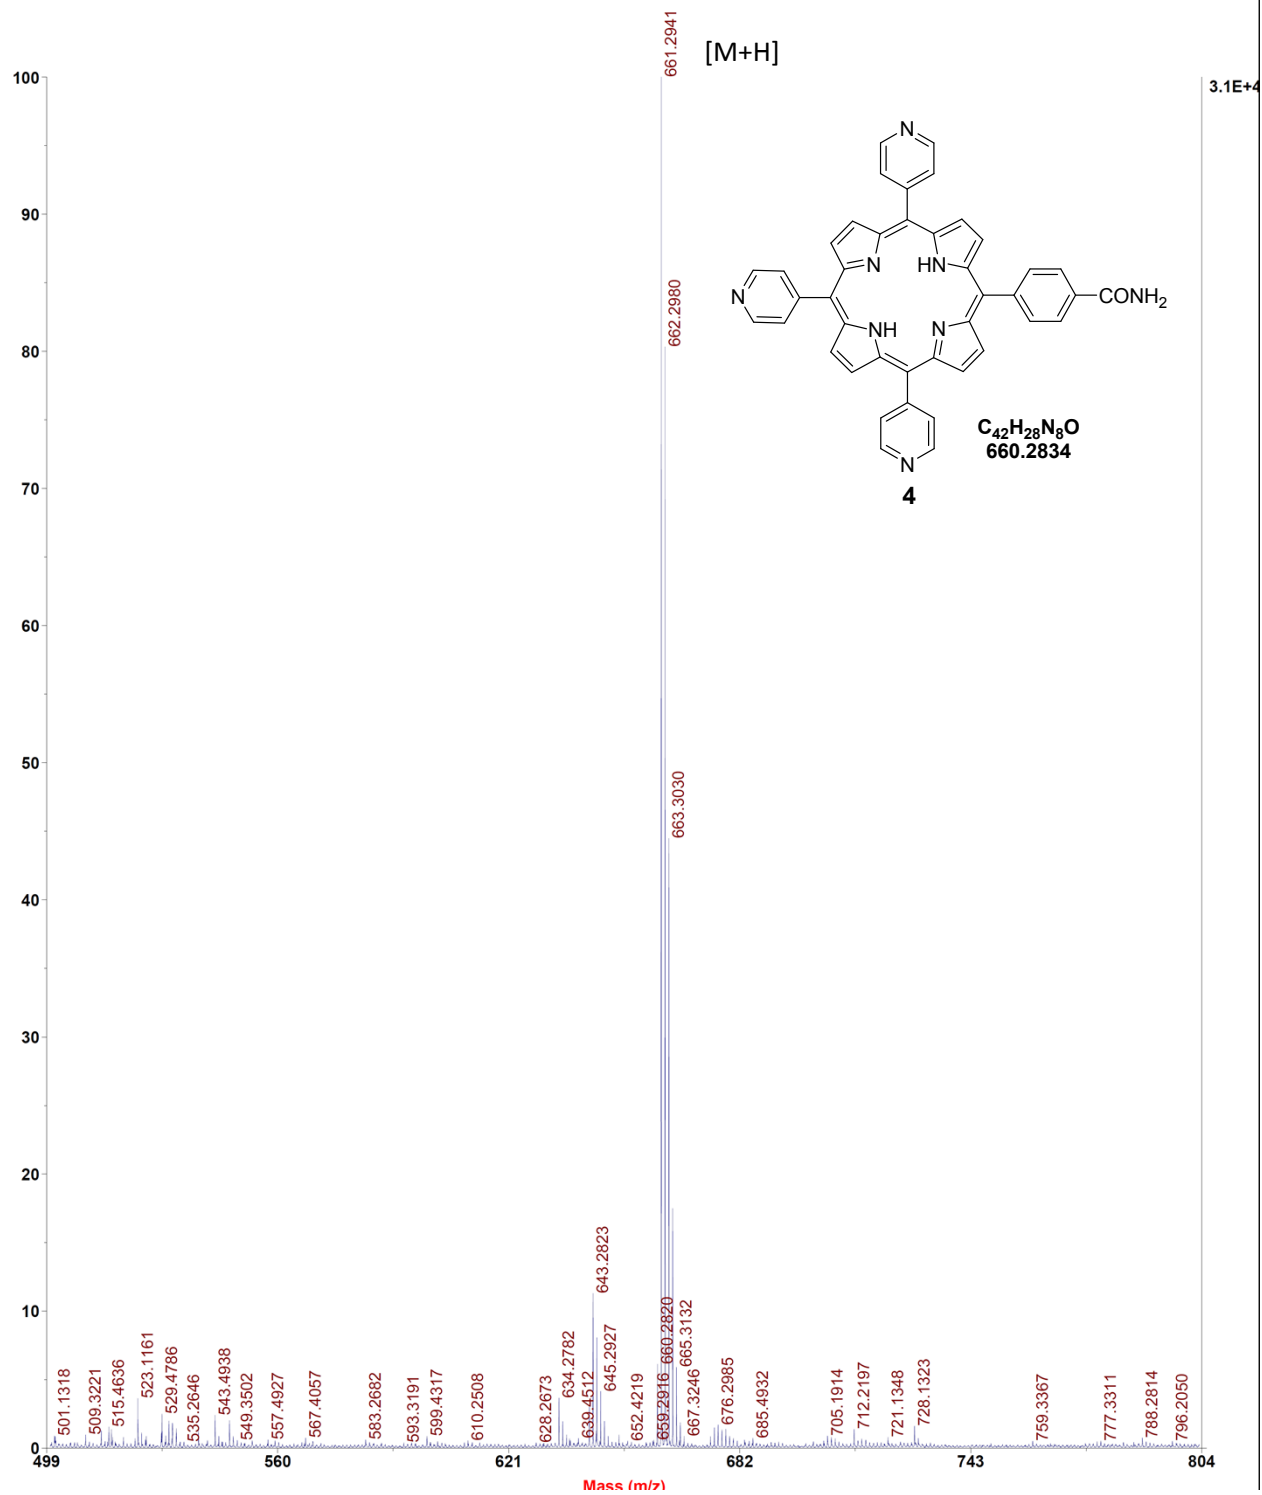

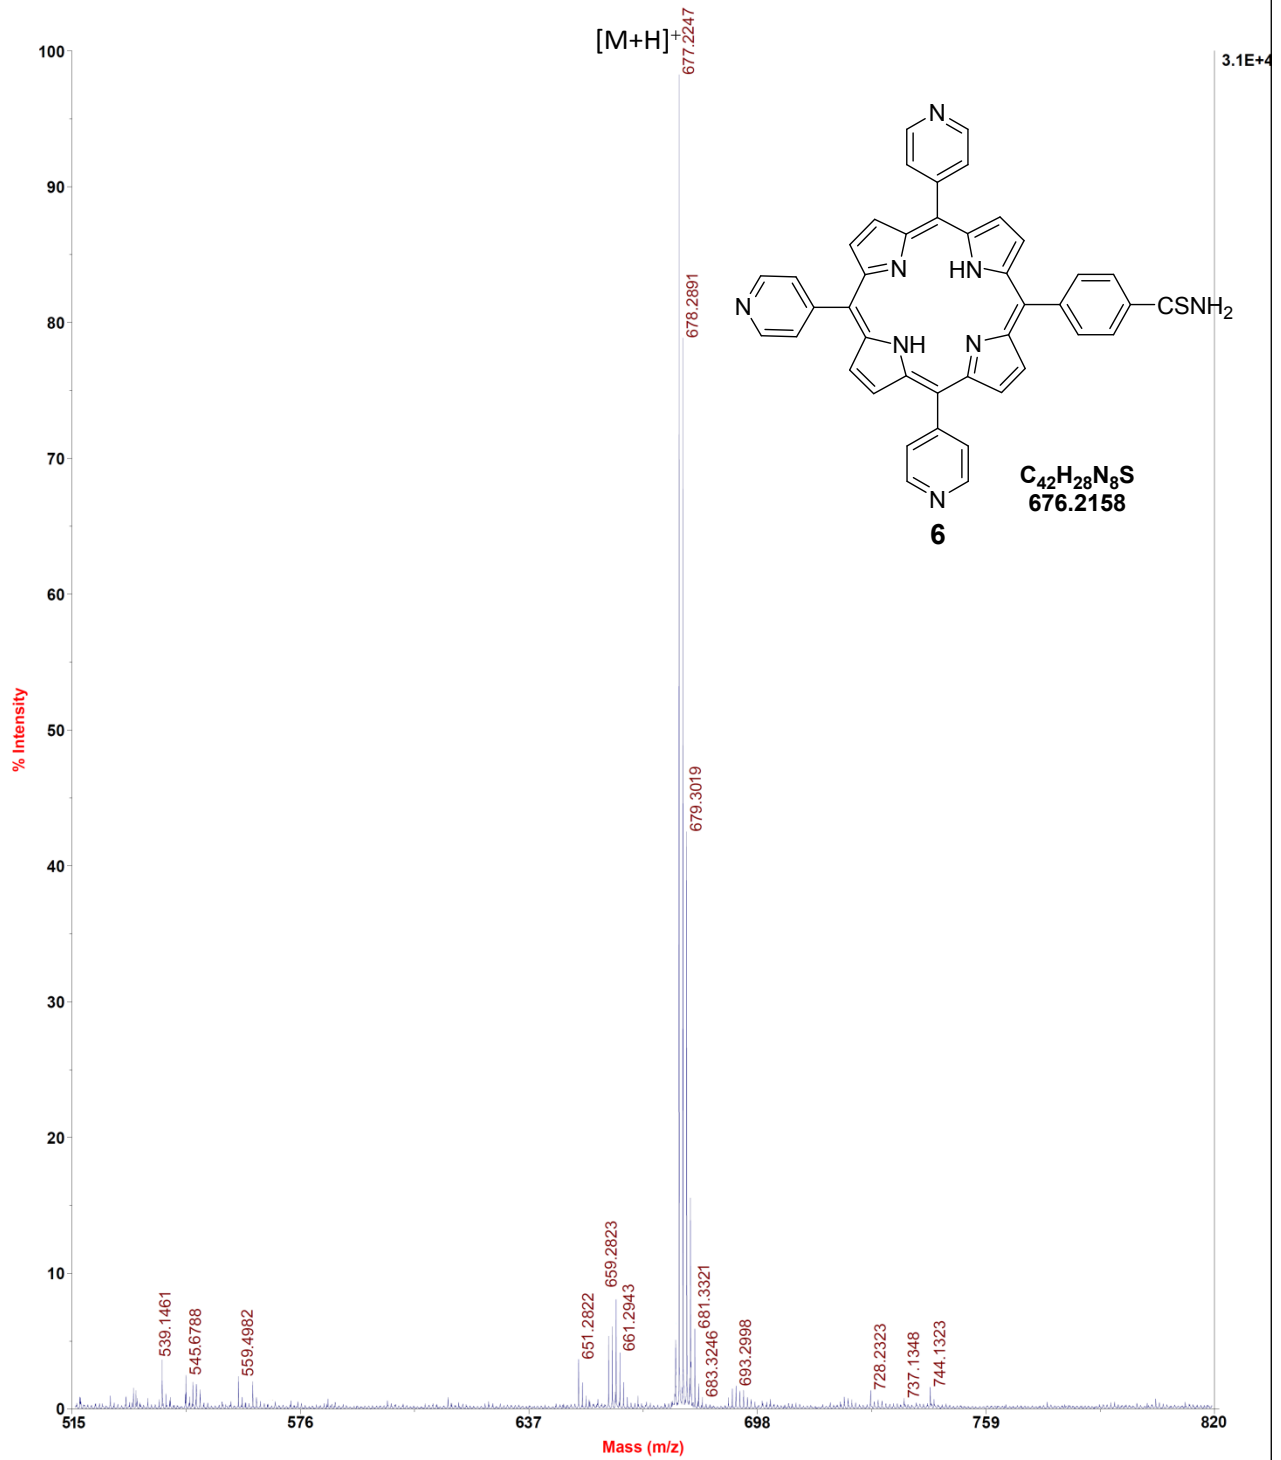



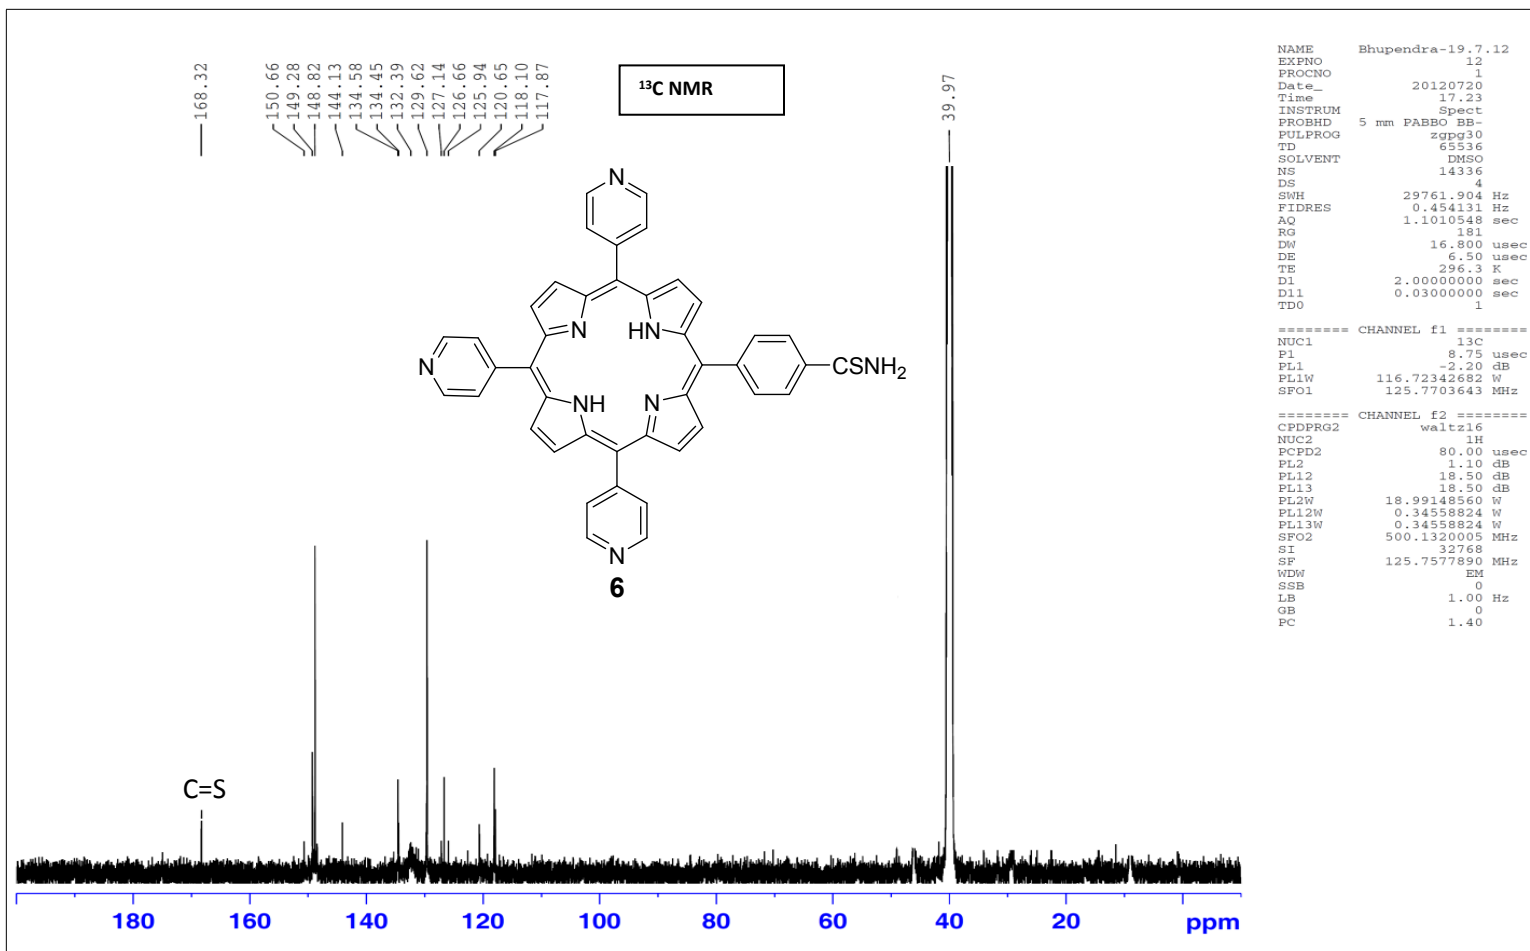

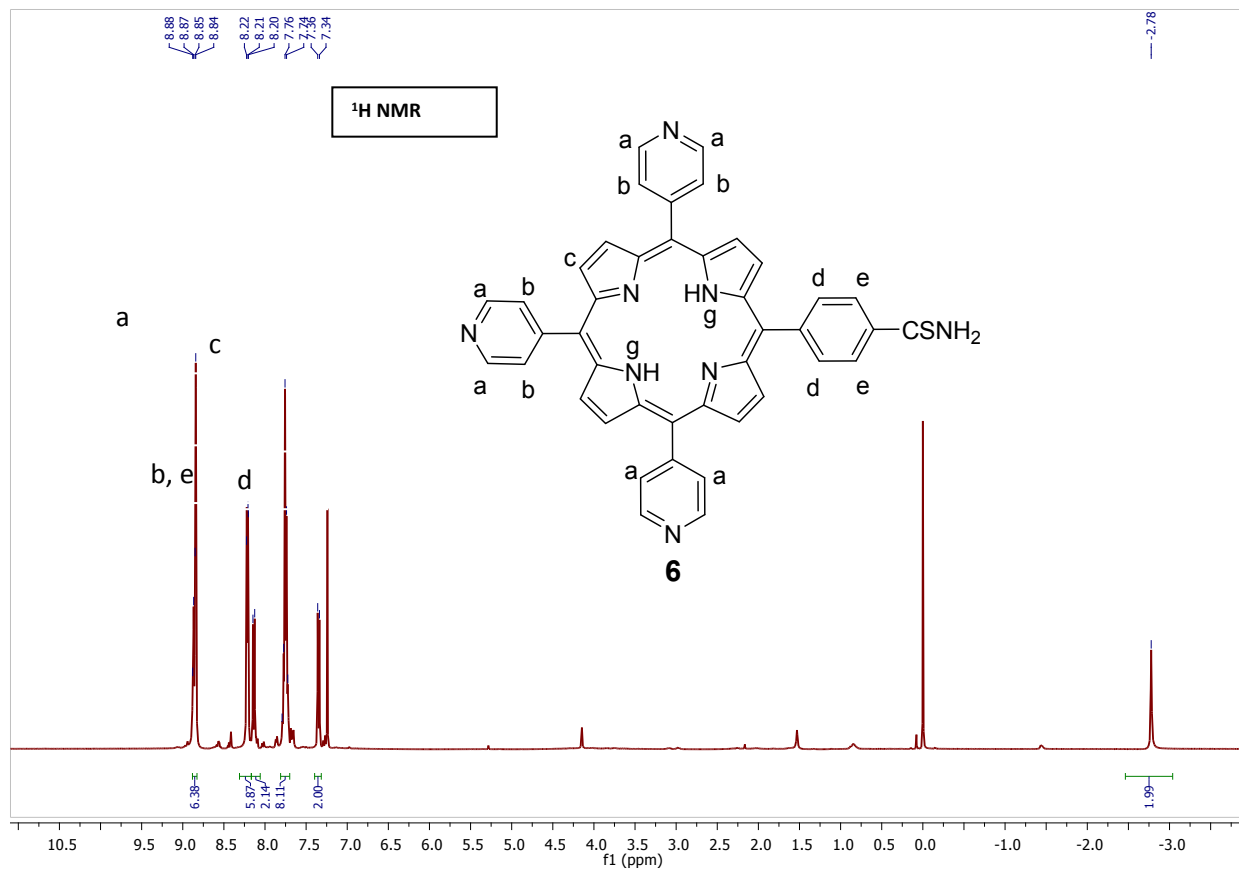

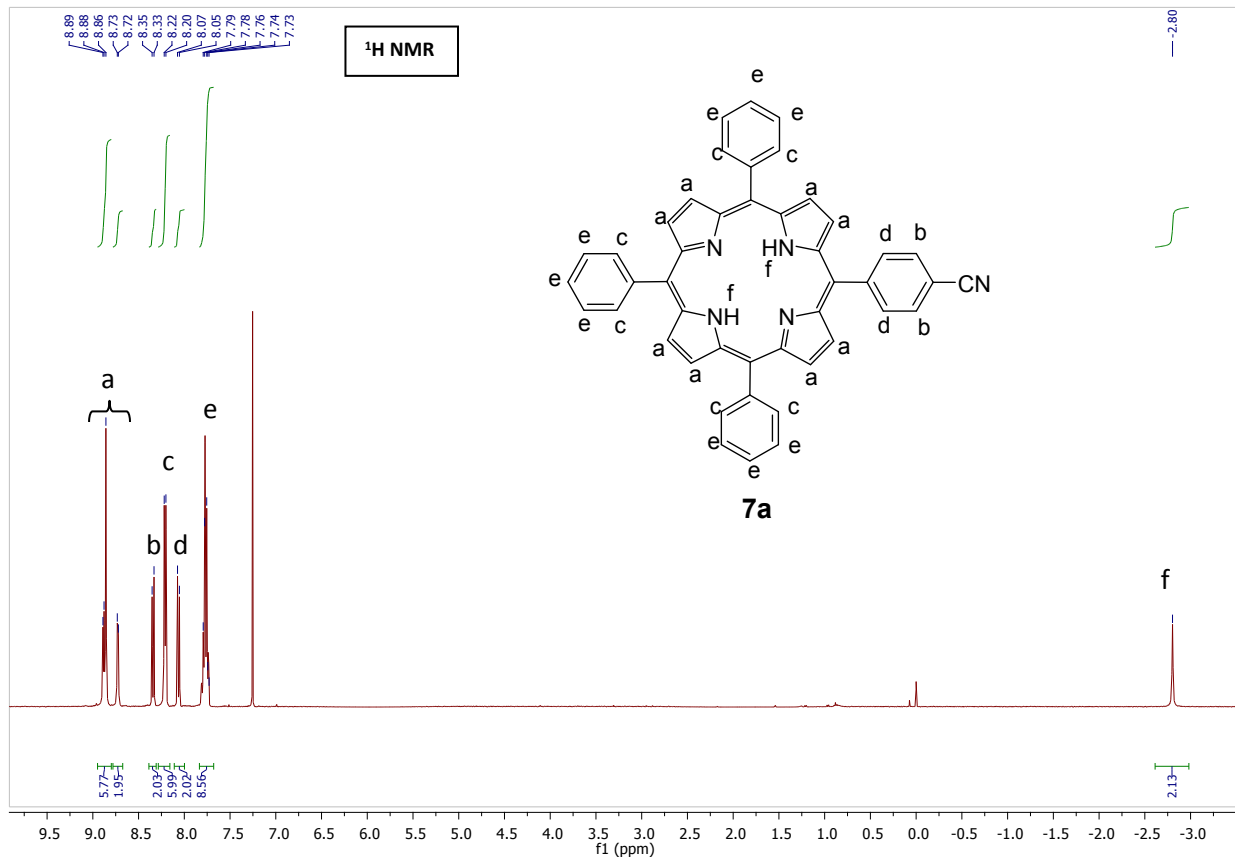

<sup>13</sup>C NMR

155.93  
144.79  
143.76  
134.44  
131.69  
130.90  
120.27  
118.84  
115.25  
114.47  
111.21

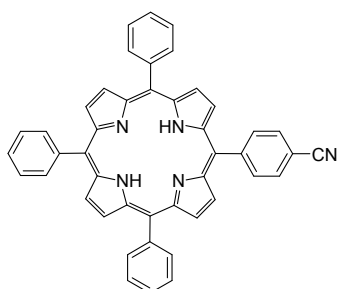

← CN

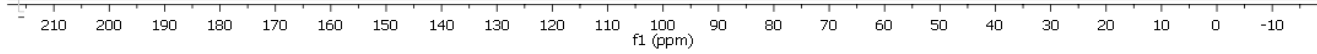

### Acquisition Parameter

|             |          |                      |          |                  |           |
|-------------|----------|----------------------|----------|------------------|-----------|
| Source Type | ESI      | Ion Polarity         | Positive | Set Nebulizer    | 0.4 Bar   |
| Focus       | Active   |                      |          | Set Dry Heater   | 180 °C    |
| Scan Begin  | 50 m/z   | Set Capillary        | 4500 V   | Set Dry Gas      | 4.0 l/min |
| Scan End    | 3000 m/z | Set End Plate Offset | -500 V   | Set Divert Valve | Source    |

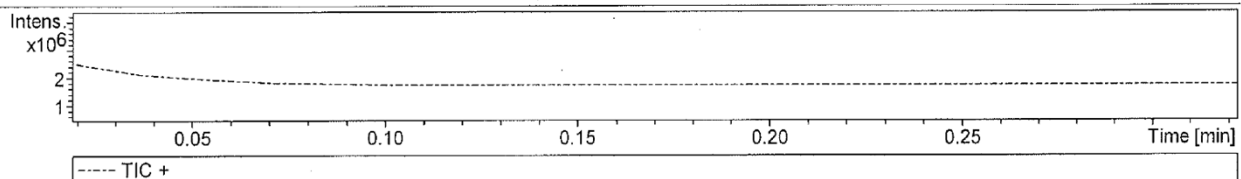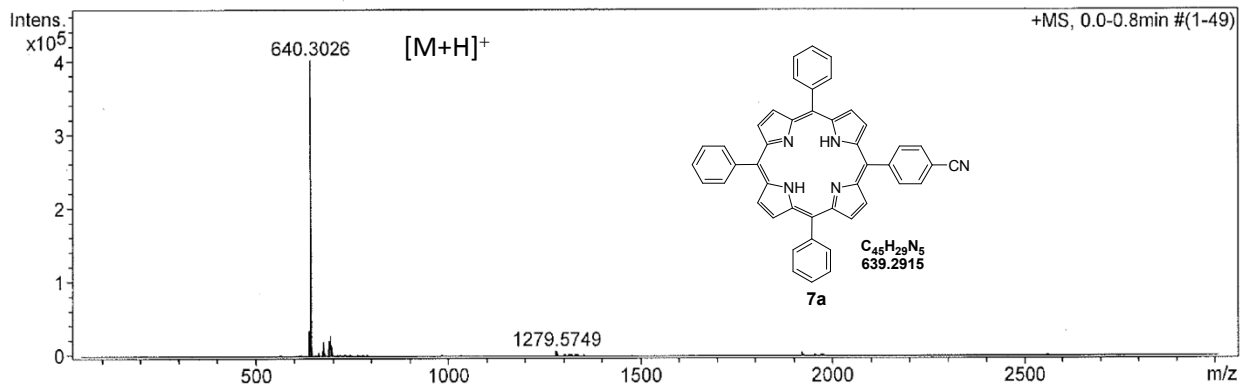

### Acquisition Parameter

|             |          |                      |          |                  |           |
|-------------|----------|----------------------|----------|------------------|-----------|
| Source Type | ESI      | Ion Polarity         | Positive | Set Nebulizer    | 0.4 Bar   |
| Focus       | Active   |                      |          | Set Dry Heater   | 180 °C    |
| Scan Begin  | 50 m/z   | Set Capillary        | 4500 V   | Set Dry Gas      | 4.0 l/min |
| Scan End    | 3000 m/z | Set End Plate Offset | -500 V   | Set Divert Valve | Source    |

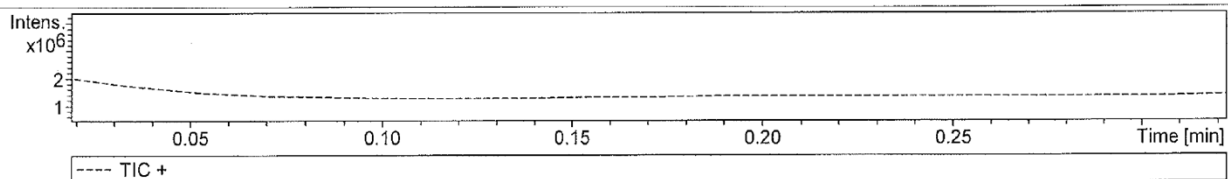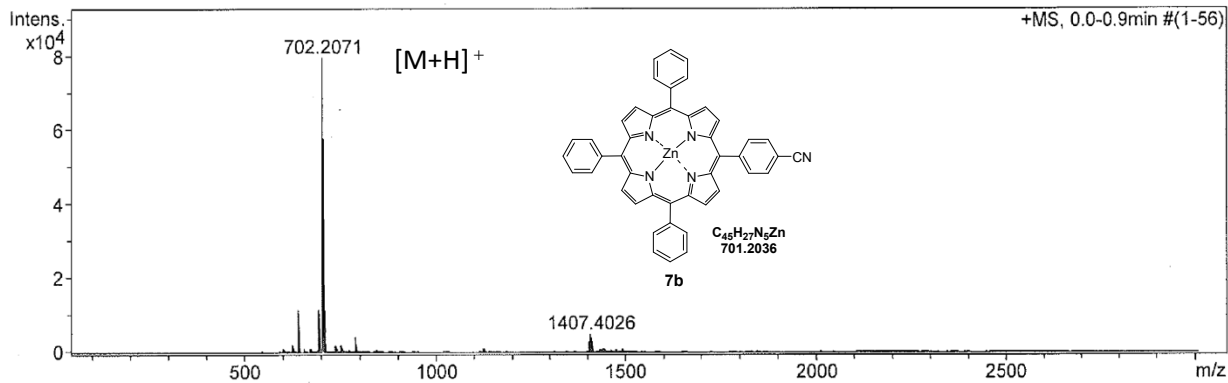

BM063

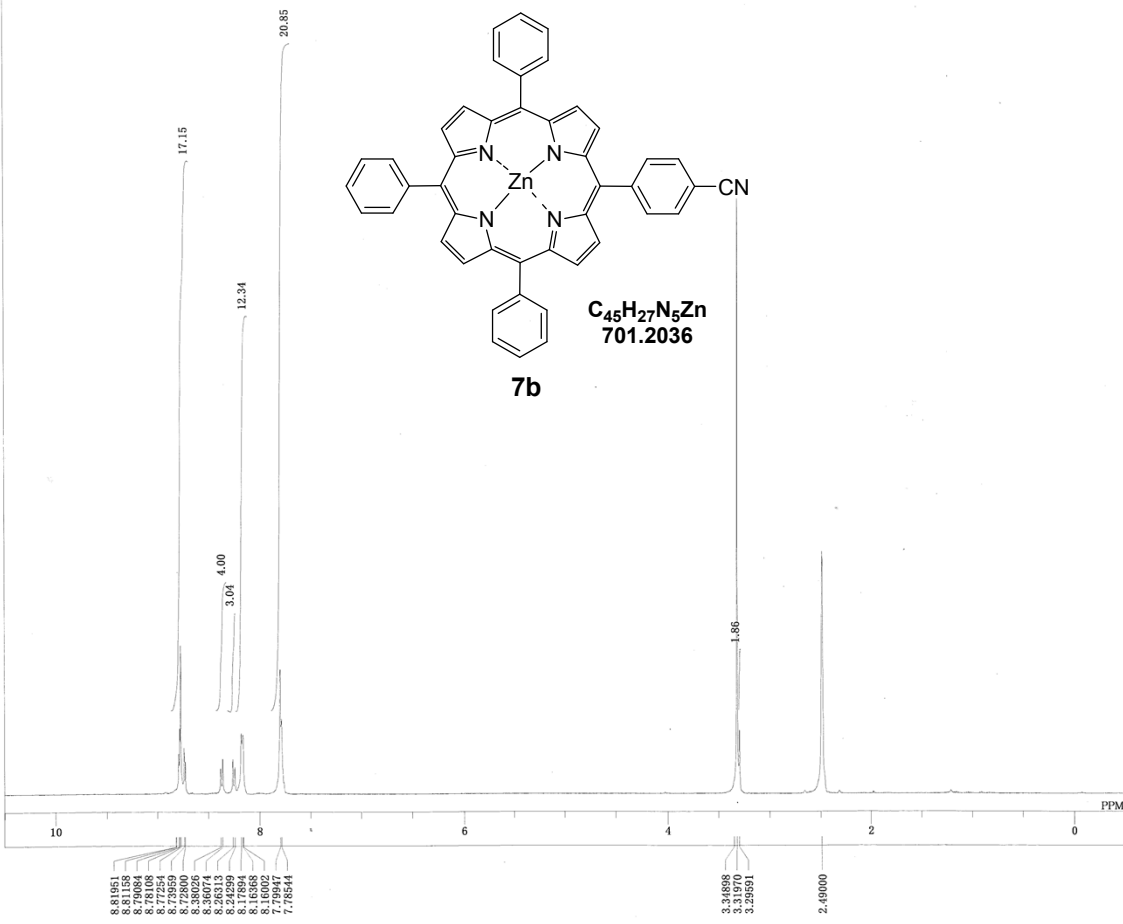

DEFAULT-ALS  
BM063  
Fri May 20 11:05:10 2011  
1H  
NON  
399.65 MHz  
124.00 KHz  
10500.00 Hz  
32768  
7992.01 Hz  
51  
2.9501 sec  
4.3500 sec  
7.20 usec  
1H  
25.1 c  
DMSO  
2.49 ppm  
0.10 Hz  
20

### Acquisition Parameter

|             |          |                      |          |                  |           |
|-------------|----------|----------------------|----------|------------------|-----------|
| Source Type | ESI      | Ion Polarity         | Positive | Set Nebulizer    | 0.4 Bar   |
| Focus       | Active   |                      |          | Set Dry Heater   | 180 °C    |
| Scan Begin  | 50 m/z   | Set Capillary        | 4500 V   | Set Dry Gas      | 4.0 l/min |
| Scan End    | 3000 m/z | Set End Plate Offset | -500 V   | Set Divert Valve | Source    |

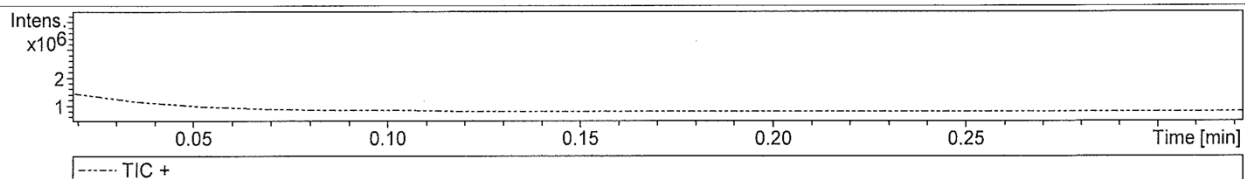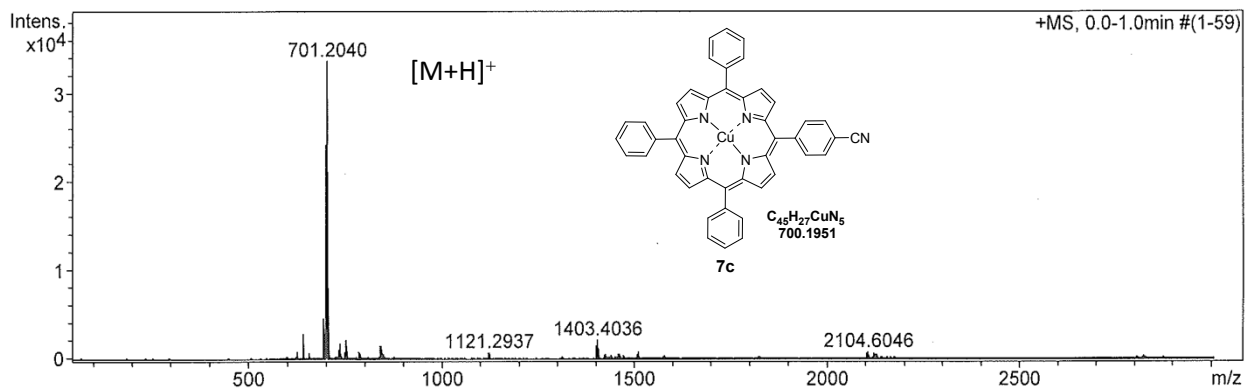



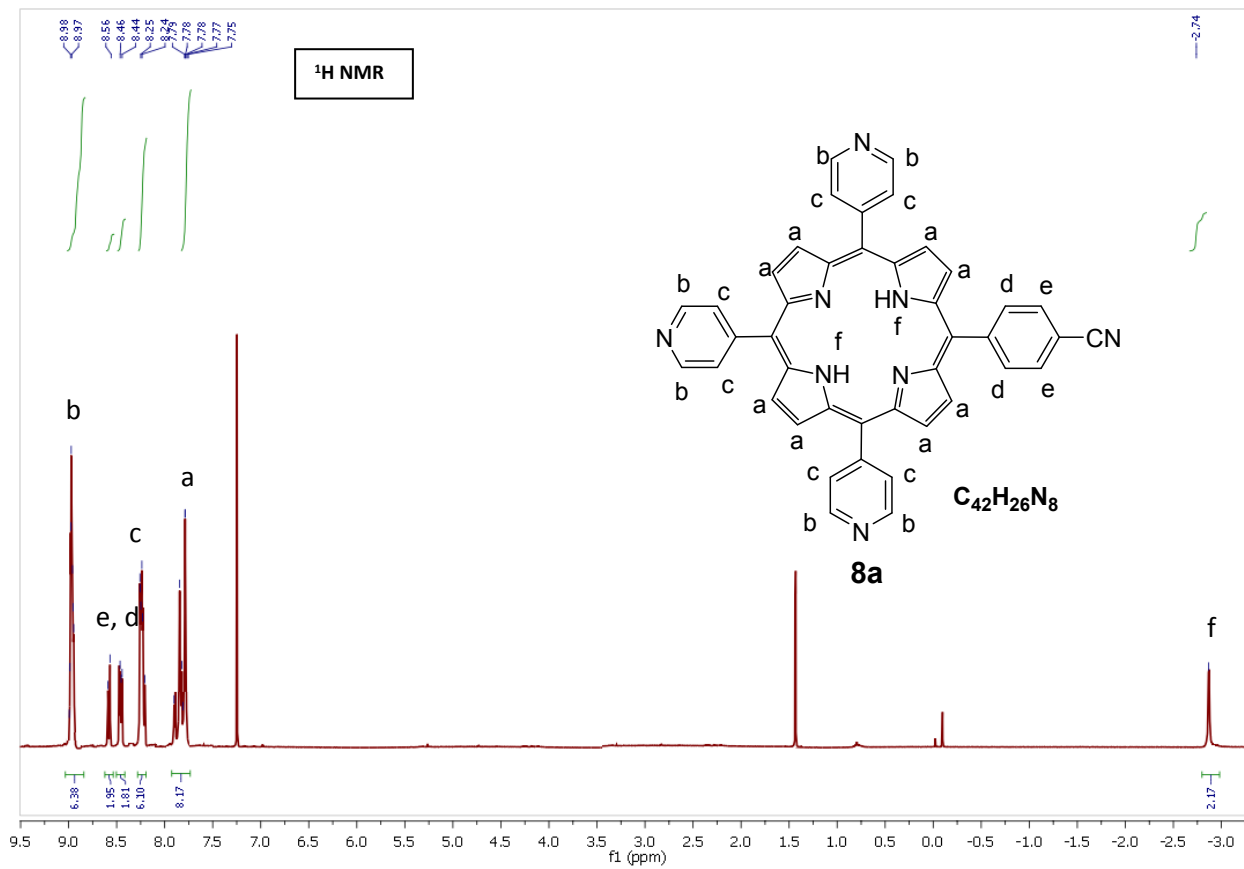

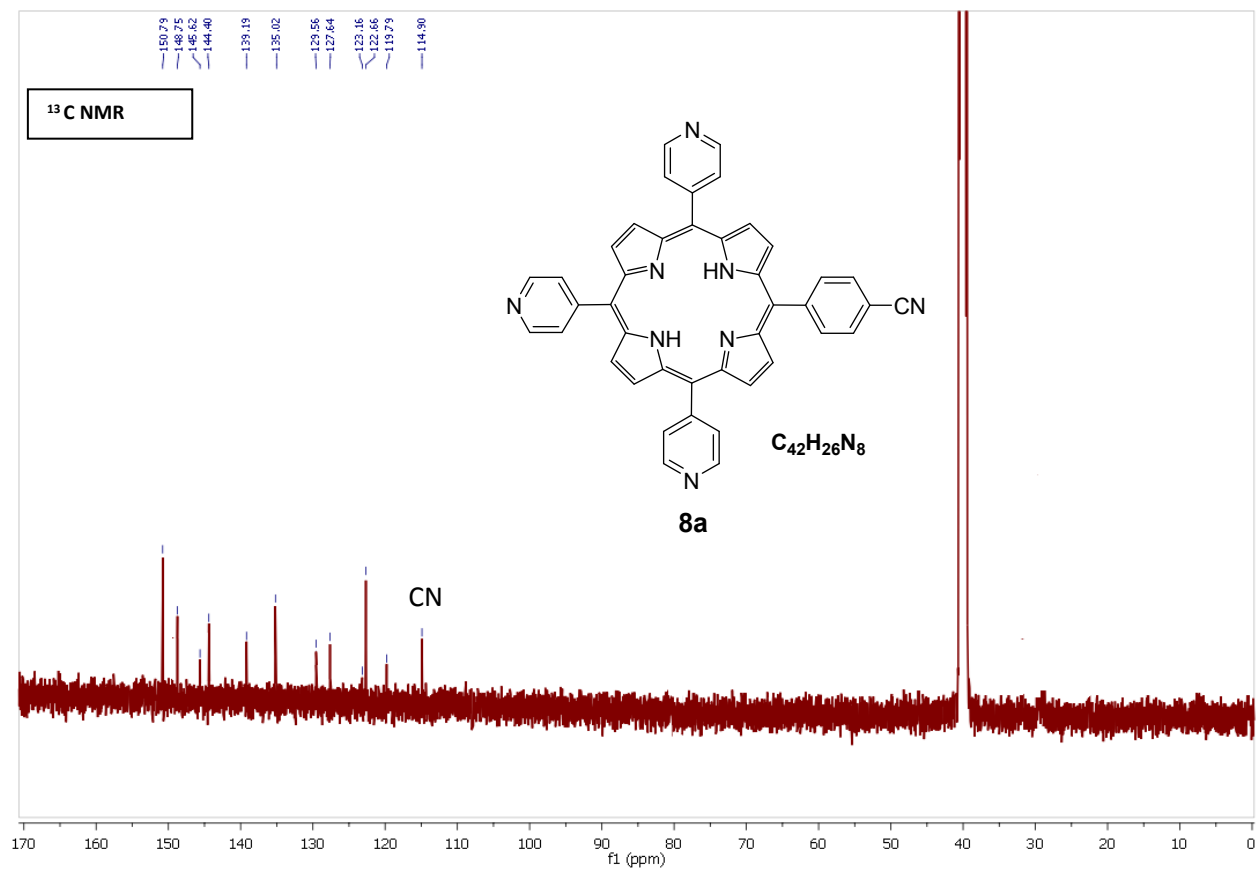

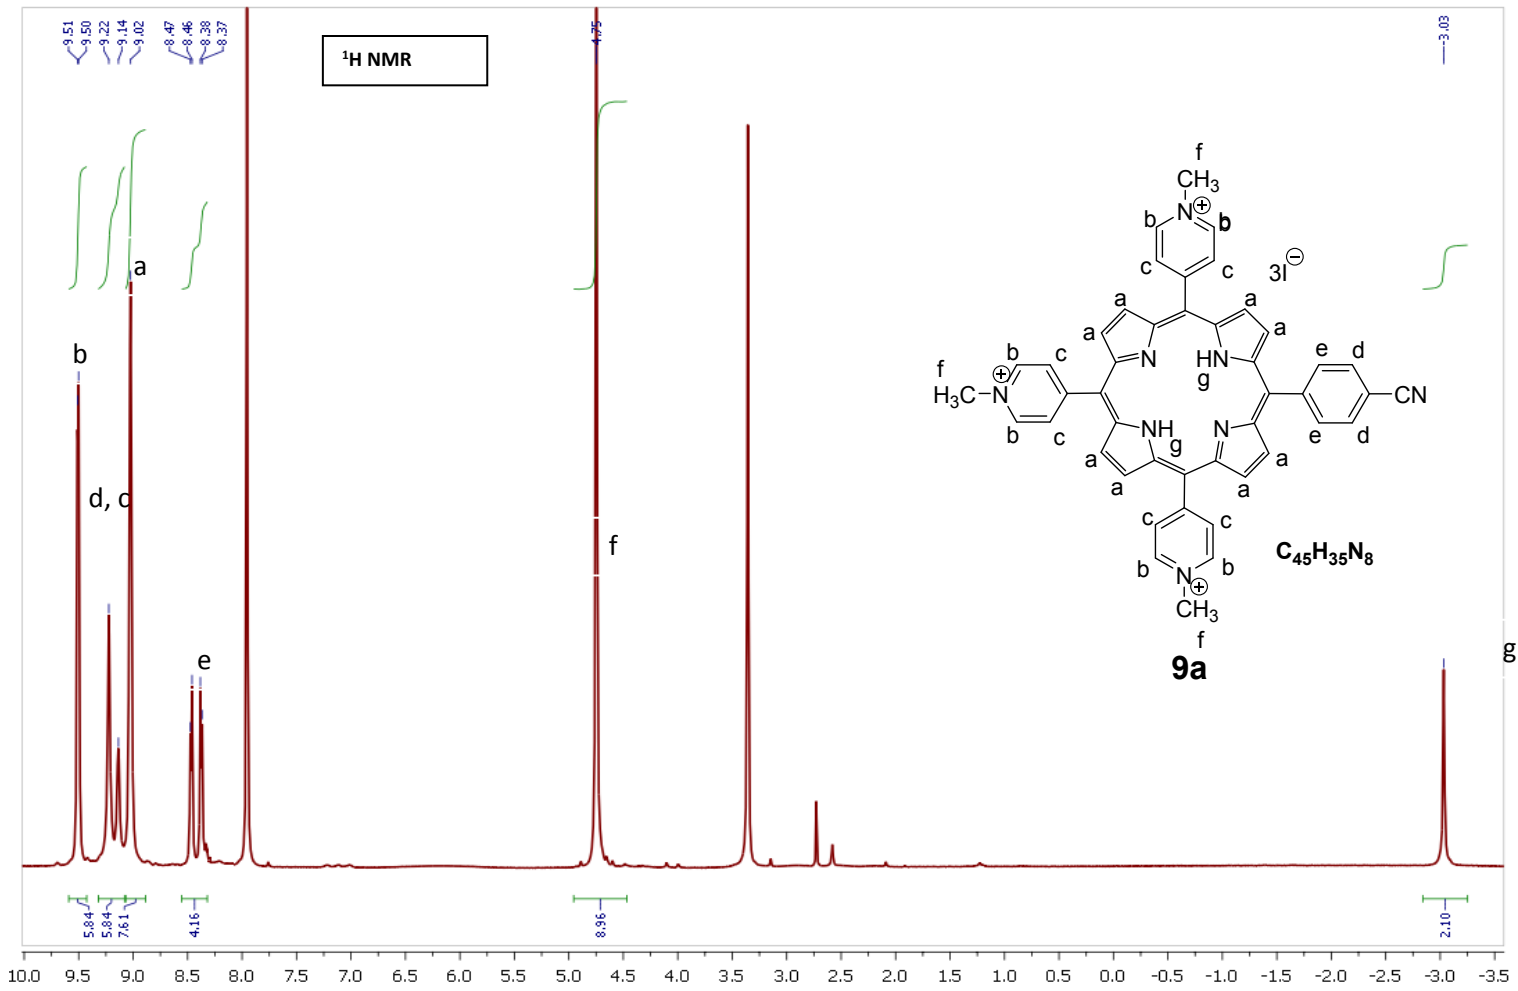

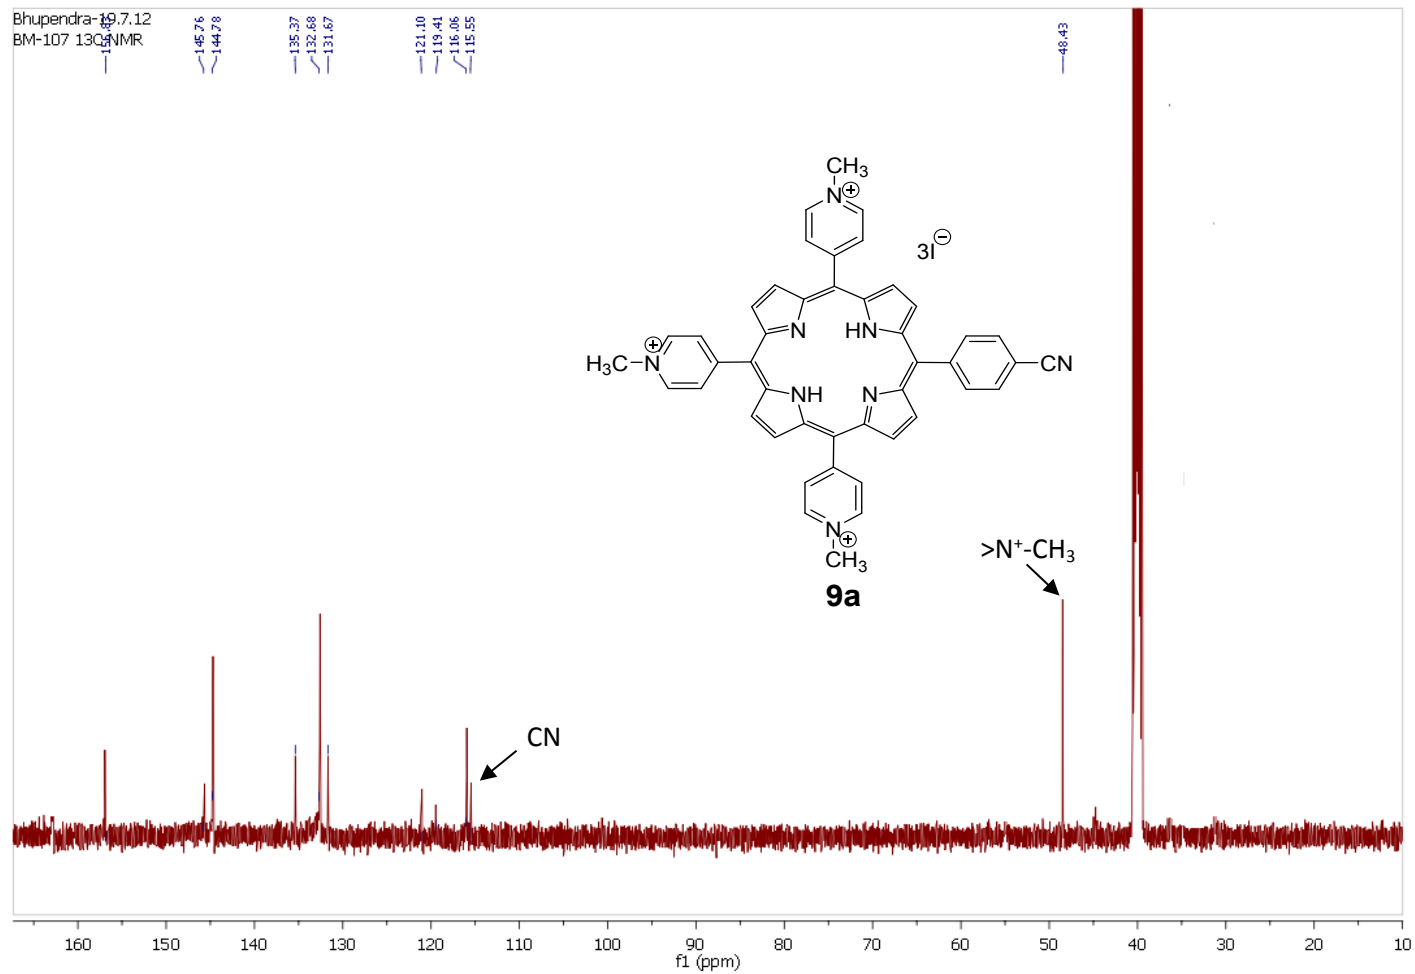

### Acquisition Parameter

|             |          |                      |          |                  |           |
|-------------|----------|----------------------|----------|------------------|-----------|
| Source Type | ESI      | Ion Polarity         | Positive | Set Nebulizer    | 0.4 Bar   |
| Focus       | Active   |                      |          | Set Dry Heater   | 180 °C    |
| Scan Begin  | 50 m/z   | Set Capillary        | 4500 V   | Set Dry Gas      | 4.0 l/min |
| Scan End    | 3000 m/z | Set End Plate Offset | -500 V   | Set Divert Valve | Source    |

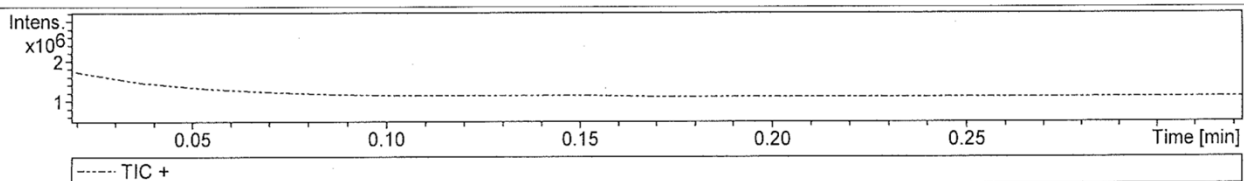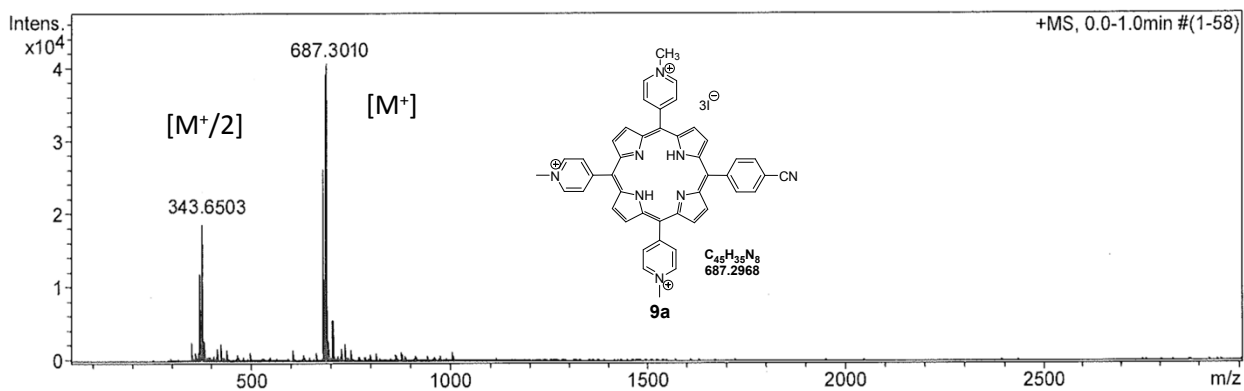

BM109

<sup>1</sup>H NMR

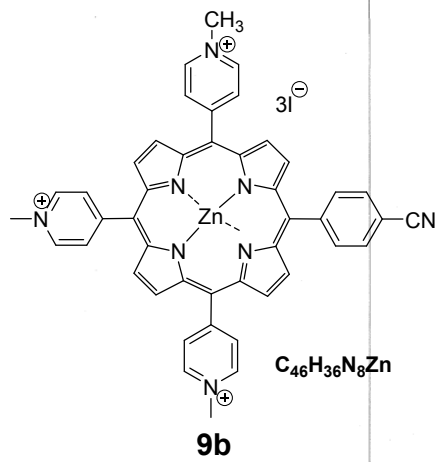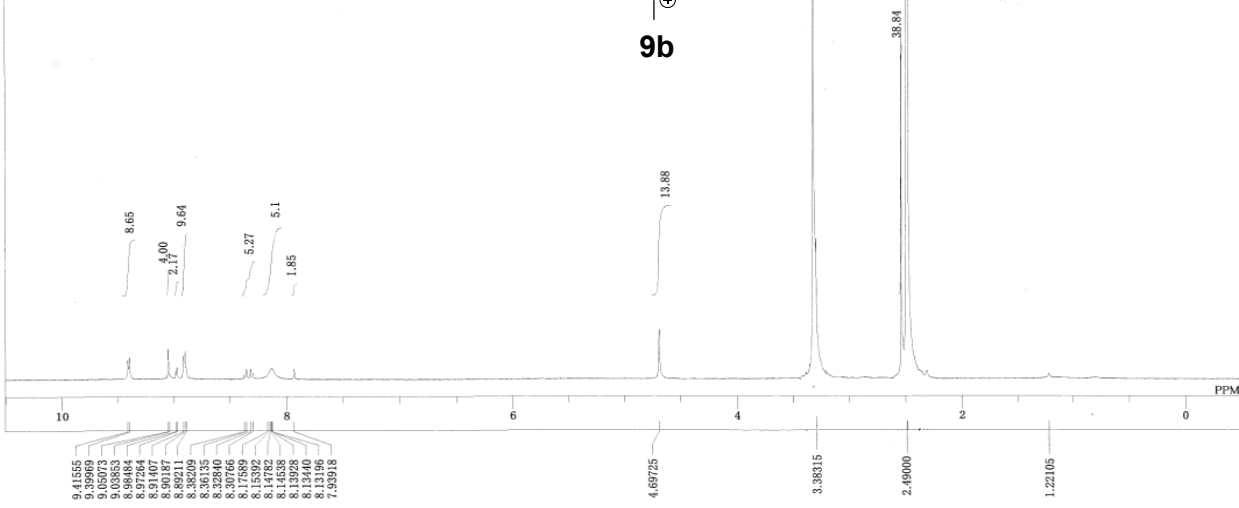

DFILE \_DEFAULT.ALS  
 COMNT BM109  
 DATIM Fri May 20 10:51:42 2011  
 OBNUC 1H  
 EXMOD NON  
 OBFREQ 399.65 MHz  
 OBSFET 124.00 KHz  
 OBFIN 10500.00 Hz  
 POINT 16384  
 FREQU 7992.01 Hz  
 SCANS 47  
 ACQTM 2.0501 sec  
 PD 4.9500 sec  
 PW1 7.20 usec  
 IRNUC 1H  
 CTEMP 25.0 c  
 SLVNT DMSO  
 EXREF 2.49 ppm  
 BF 0.10 Hz  
 RGAIN 20

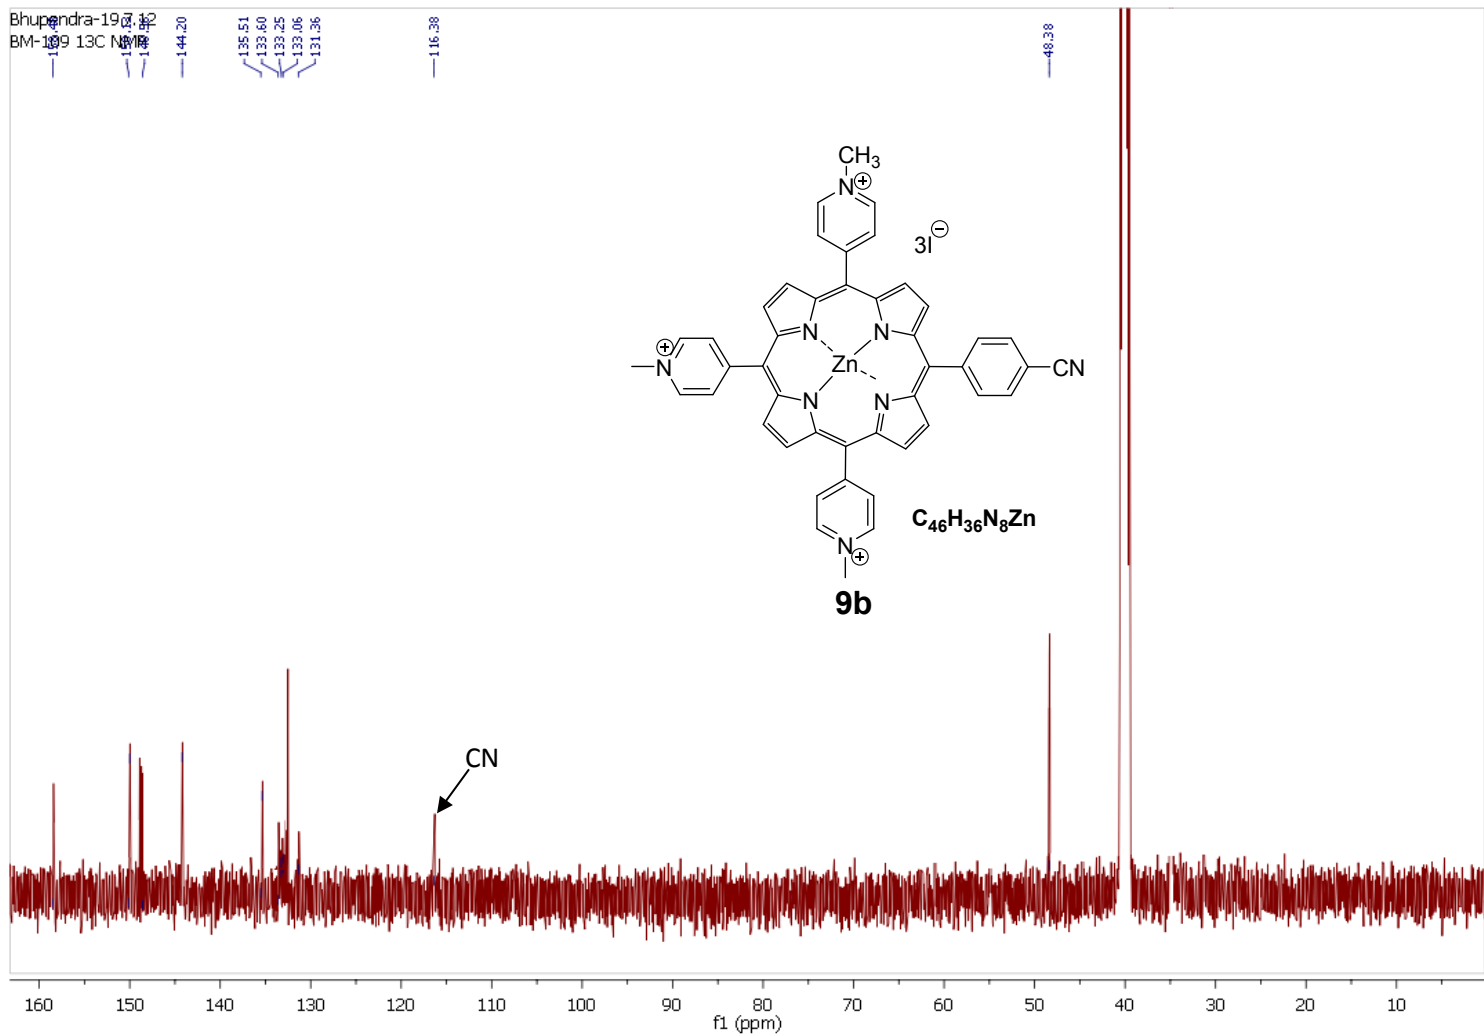

### Acquisition Parameter

|             |          |                      |          |                  |           |
|-------------|----------|----------------------|----------|------------------|-----------|
| Source Type | ESI      | Ion Polarity         | Positive | Set Nebulizer    | 0.4 Bar   |
| Focus       | Active   |                      |          | Set Dry Heater   | 180 °C    |
| Scan Begin  | 50 m/z   | Set Capillary        | 4500 V   | Set Dry Gas      | 4.0 l/min |
| Scan End    | 3000 m/z | Set End Plate Offset | -500 V   | Set Divert Valve | Source    |

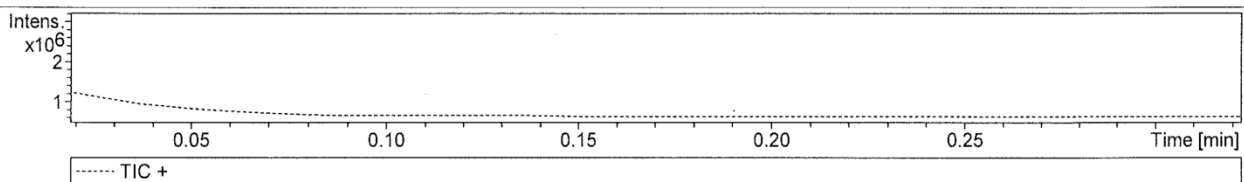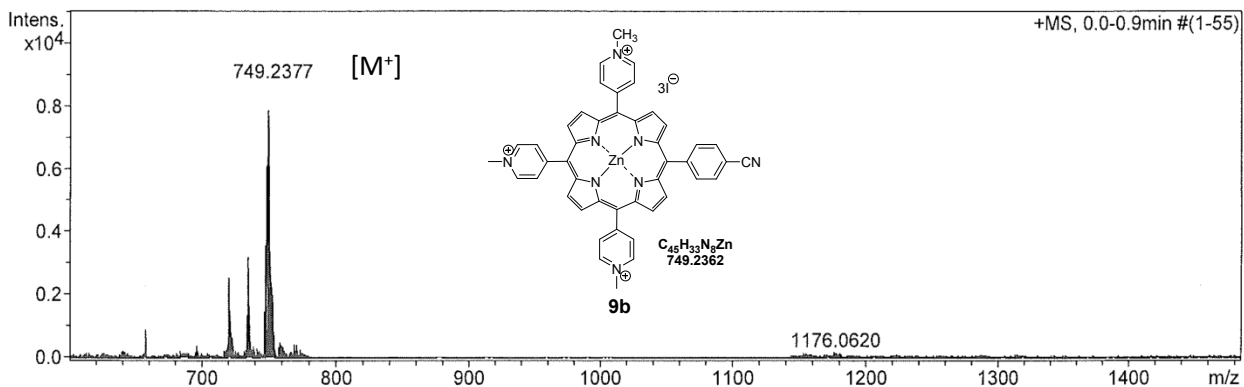



## References

1. K. Suda, T. Kikkawa, S.-I. Nakajima and T. Takanami, *J Am Chem Soc*, 2004, **126**, 9554.
2. D. Kumar, B. A. Mishra, K. C. Shekar, A. Kumar, K. Akamatsu, E. Kusaka and T. Ito, .  
*Chem. Commun.*, 2013, **49**, 683.
3. D. Kumar, N. M. Kumar, K.-H. Chang, R. Gupta and K. Shah, *Bioorg. Med. Chem. Lett*,  
2011, **21**, 5897.
4. A. R. Genady and D. Gabel, *Tetrahedron Lett.*, 2003, **44**, 2915.
5. B. Steiger and F. C. Anson, *Inorg. Chem*, 1994, **33**, 5767.
